# Supplementary material
Source: PubMed Central journal article supplement (PMC6925999)
Supplement: pnas.1909562116.sapp.pdf [file pnas.1909562116.sapp.pdf]

Supporting Information

to

# Mechanical stress compromises multicomponent efflux complexes in bacteria

Lauren A. Genova<sup>a,1</sup>, Melanie F. Roberts<sup>b,1</sup>, Yu-Chern Wong<sup>b</sup>, Christine E. Harper<sup>c</sup>, Ace George Santiago<sup>a,d</sup>, Bing Fu<sup>a</sup>, Abhishek Srivastava<sup>b,e</sup>, Won Jung<sup>a</sup>, Lucy M. Wang<sup>b,f</sup>, Łukasz Krzemiński<sup>a,g</sup>, Xianwen Mao<sup>a</sup>, Xuanhao Sun<sup>b,h</sup>, Chung-Yuen Hui<sup>b</sup>, Peng Chen<sup>a,\*</sup>, Christopher J. Hernandez<sup>b,c,\*</sup>

<sup>1</sup>L.A.G. and M.F.R. contributed equally to this work.

\*Correspondence: [cjh275@cornell.edu](mailto:cjh275@cornell.edu) (C.J.H.), [pc252@cornell.edu](mailto:pc252@cornell.edu) (P.C.)

## Table of contents

|                                                                                                                                                                                |    |
|--------------------------------------------------------------------------------------------------------------------------------------------------------------------------------|----|
| 1. Materials and experimental methods .....                                                                                                                                    | 2  |
| 1.1. Microfluidic device .....                                                                                                                                                 | 2  |
| 1.2. Fluid pressure calculation .....                                                                                                                                          | 4  |
| 1.3. Loading of device – protocol .....                                                                                                                                        | 5  |
| 1.4. Deformations of bacteria submitted to stepwise increases in extrusion loading .....                                                                                       | 7  |
| 1.5. Analytical model of cell envelope stress state .....                                                                                                                      | 7  |
| 1.6. Finite element model for bacteria submitted to mechanical loading .....                                                                                                   | 11 |
| 1.7. Bacterial strain construction .....                                                                                                                                       | 15 |
| 1.8. Cell sample preparation .....                                                                                                                                             | 15 |
| 1.9. Single-molecule tracking (SMT) and single-cell quantification of protein concentration (SCQPC) .....                                                                      | 16 |
| 1.10. Single-molecule imaging data analysis .....                                                                                                                              | 16 |
| 1.11. Quantification of stage drift: it is insignificant within our experimental time. ....                                                                                    | 18 |
| 1.12. Analysis of diffusive behaviors of CusA <sup>mE</sup> in cells to determine its diffusive states and the associated diffusion constants and fractional populations ..... | 19 |
| 1.13. Determination of effective disassembly rate constant .....                                                                                                               | 21 |
| 1.14. Agarose embedding assay of cell growth .....                                                                                                                             | 23 |
| 2. Pairwise distance distribution analysis supports that clustering or declustering is not responsible for the observed population shifts in CusA disassembly .....            | 27 |
| 3. Estimation of energy needed to disrupt the CusCBA complex .....                                                                                                             | 28 |
| 4. Additional results on cell growth rate within tapered channels .....                                                                                                        | 30 |
| 5. Stiffness–sorted analysis suggests softer cells are more responsive to pressure–induced deformation) .....                                                                  | 31 |
| 6. Additional references .....                                                                                                                                                 | 32 |

## 1. Materials and experimental methods

### 1.1. Microfluidic device

A microfluidic device was used to mechanically stimulate individual bacteria (1, 2). Six devices were placed onto each fabricated wafer (Fig. S1A). Each one of the six devices had four subdivisions, visible as four diamond-like shapes in the device (Fig. S1A-B). The diamond-like subdivisions contained five fanned-out channels (Fig. S1B). Each channel led to a functional unit for extrusion loading experiments (Fig. S1B-C). A functional unit consisted of sixty tapered channels arranged in twelve groups of five, with a long bypass channel connecting all tapered channels (Fig. S1C-D). Tapered channels were designed with an inlet width large enough to permit entry of individual bacteria ( $1.2\ \mu\text{m}$ ) and exit widths small enough to inhibit bacterial exit ( $250\ \text{nm}$ ). Each tapered channel had a length of  $75\ \mu\text{m}$  between inlet and outlet. Fluid flow through the bypass channel generated a difference in fluid pressure across each tapered channel. Bacteria submitted to loading within the tapered channels were observed using microscopy (Fig. S1E).

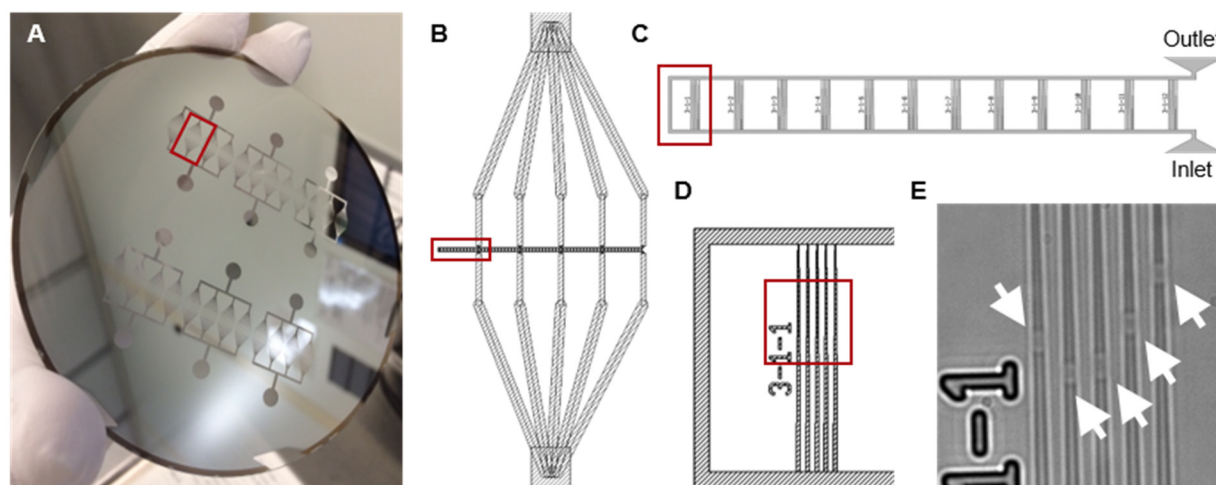

**Fig. S1.** Microfluidic device design. Design and measurements from a typical device are shown. (A) A patterned wafer shown during the fabrication process, with the chromium hard mask still present. Six devices were patterned into fused silica. Inlets and outlets are seen as circles above and below each device. A red box indicates one subdivision in a device. (B) Within a subdivision, channels carry bacterial cultures towards five functional units (red box indicating one functional unit). (C) In one functional unit, twelve groups of five tapered channels are arranged along a bypass channel. (D) A close-up view of two sets of five tapered channels from the red box in c is shown. Numbers adjacent to each set of tapered channels allow for identification and image processing. (E) A bright-field image of *E. coli* cells (arrows) trapped in five tapered channels.

Sub-micron patterns in the microfluidic devices were fabricated using Deep UV (DUV) lithography at the Cornell Nanoscale Science & Technology Facility. The device was manufactured from fused silica to achieve optical clarity and large stiffness. Fused silica wafers,  $500\ \mu\text{m}$  thick, with a  $100\ \text{mm}$  diameter (WF3937X02031190, Mark Optics, Santa Ana, CA, USA). Bare wafers were initially cleaned with RCA1 (10 min 6:1:1  $\text{H}_2\text{O}:\text{NH}_4\text{OH}:\text{H}_2\text{O}_2$  at approximately  $70^\circ\text{C}$ ) and RCA2 (10 min 6:1:1  $\text{H}_2\text{O}:\text{HCl}:\text{H}_2\text{O}_2$  at approximately  $70^\circ\text{C}$ )

procedures. A 55 nm thick chromium etch hard mask was sputter-deposited (3 mTorr, 150 W, 450 sec) onto the cleaned surface (Orion 8, AJA International, Scituate, MA, USA). Residue on the bottom of the wafer from the sputter deposition process was removed in a Nanostrip bath (10 min at approximately 50°C). A 60 nm thick layer of anti-reflective coating (ARC, DUV 42P, Brewer Science, Rolla, MO, USA) and a 510 nm thick layer of DUV photoresist (UV210, MicroChem, Westborough, MA, USA) were deposited on the chromium hard mask using an automated spinner and hot plate system (Gamma, Suss MicroTec AG, Garching, Germany). Thickness and uniformity of the ARC and DUV photoresist layers were validated by optical measurement (FilMetrics, San Diego, CA, USA). Exposure of the DUV photoresist was accomplished with a DUV Stepper at approximately 28 mJ/cm<sup>2</sup> exposure and approximately -0.14 μm focus offset, 0.63 numerical aperture, and 0.8 outer sigma (ASML 300C, Veldhoven, Netherlands). The exposed photoresist was then developed for 60 sec with a single puddle (AZ 726 MIF, MicroChemicals GmbH, Ulm, Germany).

The exposed pattern was transferred to the silica substrate using plasma etching. An Ar/O<sub>2</sub> etch was performed to transfer the pattern from the DUV photoresist to the ARC layer (1.5 min, 42.5 sccm Ar, 7.5 sccm O<sub>2</sub>, 15 mTorr, PlasmaLab 80+, Oxford Instruments, Oxfordshire, England), followed by a Cl<sub>2</sub>/O<sub>2</sub>/Ar etch to transfer the pattern to the chromium hard mask below (90s, 1 sccm Cl<sub>2</sub>, 9 sccm O<sub>2</sub>, 3 sccm Ar, 30 mTorr, Minilock III, Trion Technology, Tempe, AZ, USA). Oxygen plasma was used to remove residual photoresist and ARC (3 min, 50 sccm O<sub>2</sub>, 60 mTorr, Oxford 80+). The exposed chromium pattern was then transferred to the silica substrate using a CHF<sub>3</sub>/Ar etch (4:35 min, 30 sccm Ar, 20 sccm CHF<sub>3</sub>, 4 mTorr, 50°C). A chrome wet etch was performed to clean off residual chromium (Cyantek CR-14, KMG, Fort Worth, TX, USA), leaving behind bare silica with the etched device pattern. Thru holes were laser-etched into the patterned silica wafer to serve as inlets and outlets (VersaLaser VLS3.50, Universal Laser Systems, Scottsdale, AZ, USA). Ridges in the silica resulting from the laser etch were removed with a 10 sec 6:1 BOE dip coupled with abrasions from a diamond drill bit (1 mm diamond drill, Lasco Diamond Products, Chatsworth, CA, USA).

Characterization was performed to confirm channel depths (Fig. S2A). Depths of device feeder channels were confirmed using a profilometer (P10, KLA-Tencor, Milpitas, CA, USA). Characterization of taper dimensions was performed with SEM (UltraSEM, Zeiss, Oberkochen, Germany) and AFM (Icon, Veeco, Plainview, NY, USA), where taper inlet and outlet widths were measured with SEM images and channel depths were sampled with a high-aspect ratio AFM tip (Fig. S2B-C). Once device characterization was finished, the patterned silica wafer was bonded to a thin, bare silica wafer to seal the device (170 μm thickness, WF3937X02031190, Mark Optics). A wafer thickness of 170 μm is equivalent to a no.1 thickness microscope slide. The fused silica wafers were put through a MOS clean sequence of RCA1, RCA2, and RCA1 baths before drying in a spin-rinse-dryer. Immediately afterwards, the patterned and bare silica wafers were bonded together and annealed in a furnace tube at 1100°C for 5 hr in a N<sub>2</sub> environment. Once bonded, wafers were removed from the furnace and allowed to sit for a minimum of one week at room temperature before use.

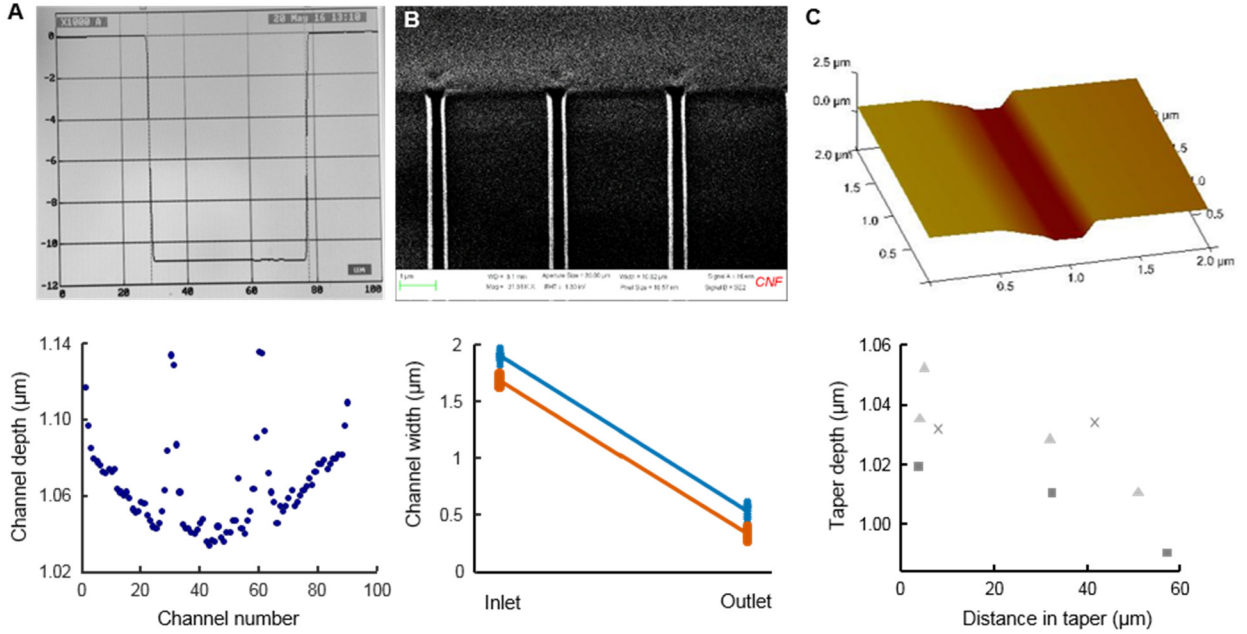

**Fig. S2.** Validation of microfluidic dimensions was performed using profilometry, SEM, and AFM. Measurements from a typical device are shown. (A) Prior to sealing devices, fluidic channels with large widths were scanned by a profilometer. Variations in channel depth within the testing region of the device were no more than 10%. (B) Inlet and outlet widths for tapered channels were measured by SEM. Variation between wafers could be large (up to 60%), but variation within one experimental device was smaller (20%). (C) AFM was used to verify tapered channel depths were less than 1200 nm. Sample measurements from three wafers are shown and indicated using distinct symbols.

## 1.2. Fluid pressure calculation

The fluidic pressure through the device was determined from the inlet pressure (measured) and hydraulic circuit model (3). Fluidic pressure was determined using the Hagen–Poiseuille law (Equation S[1]), where  $Q$  is the flow rate,  $\Delta P$  is the pressure difference between the inlet and outlet of a channel, and  $R_h$  is the hydraulic resistance of the channel.

$$\Delta P = QR_h \quad \text{S[1]}$$

Poiseuille flow was assumed for channels where the ratio between width and depth was small (width/depth < 20). The hydraulic resistance determined using Poiseuille flow is shown in Equation S[2], where  $\mu$  is the fluid viscosity,  $L$  is the channel length,  $A$  is the cross-sectional area, and  $r_h$  is the hydraulic radius of the channel (3).

$$R_h = \frac{8\mu L}{Ar_h^2} \quad \text{S[2]}$$

The hydraulic radius is an equivalent length of the channel's geometry, defined below in Equation S[3] where  $P$  is the channel perimeter.

$$r_h = \frac{2A}{P} \quad \text{S[3]}$$

Plane Poiseuille flow was assumed when the ratio between width and depth of the fluidic channel was large (width/depth > 20). Hydraulic resistance determined for plane Poiseuille flow is given in Equation S[4], where  $h$  is the height (depth) of the channel.

$$R_h = \frac{12\mu L}{Ah^2} \quad \text{S[4]}$$

### 1.3. Loading of device – protocol

Fluid was delivered to the device using a syringe pump (Fusion Infusion 400 Syringe Pump, Chemyx, Stafford, TX, USA) with a 3mL syringe (Monojet, Medtronic, Minneapolis, MN, USA) connected to capillary tubing (OD 360  $\mu\text{m}$ , IDEX-HS 1572, IDEX, Lake Forest, IL, USA) (Fig. S3). The capillary tubing and syringe were joined together with a luer adapter (P-642, IDEX) and union assembly (VICI ZRU1.5XC union, VICI C-NL.35L sleeve, VICI C-NNFFPK ferrule extracted from fitting, VICI Valco Instruments, Houston, TX, USA). A pressure sensor (uPS0800-C360-10, LabSmith, Livermore, CA, USA) was attached to the capillary tubing line using an interconnect tee (C360-203, LabSmith) and threaded fittings (C360-100, LabSmith). A seal was formed between the capillary tubing and device inlet using a fluidic attachment (BMP-LP-MAG, CorSolutions, Ithaca, NY, USA) and flat-bottomed PEEK ferrule (N-123-03, IDEX).

A solution of 70% EtOH (0.5 mL) was flushed through the capillary tubing to clean out any residue, followed by sterile growth media to prime the tubing line. For super-resolution microscopy, 1X-M9 minimal media was used (see “1.8. Cell sample preparation”) as the growth media. For diffraction-limited microscopy, sterile LB Broth was used (see “1.8. Cell sample preparation”). For copper-treated media, sterile LB Broth was treated with 2.5 mM of  $\text{CuSO}_4$  (see “1.8. Cell sample preparation”).

After flushing the lines with experimental media, the capillary tubing was attached to the device and connected with the fluidic attachment. Force was applied on a syringe plunger to increase fluidic pressure. The pressure in the fluid was measured and maintained at approximately 80 kPa for 6 min to wet the channels and flush out air bubbles. Once the device channels were wetted, the tubing line was disconnected from the device. The capillary tubing was then flushed with 0.25 mL of media with bacteria.

To load bacteria into the device, the syringe with bacteria was removed and exchanged for a syringe with sterile media to prevent bacterial concentrations from becoming too great. The capillary tubing was then reconnected to the device with the fluidic attachment. The media-filled syringe connected to the capillary tubing was mounted onto a syringe pump, and pressure was increased until bacteria were observed within the tapered channels (Fusion 400 Syringe Pump, Chemyx, Stafford, TX, USA). Once bacteria were loaded into the tapered channels, the pressure was reduced to the desired experimental value (the magnitude of pressure while loading was not found to influence results). For the experimental condition of zero applied pressure where  $\Delta P$  is

zero for all cells trapped in the tapered channels, the capillary tubing was removed from the device after loading the cells into the tapered channels.

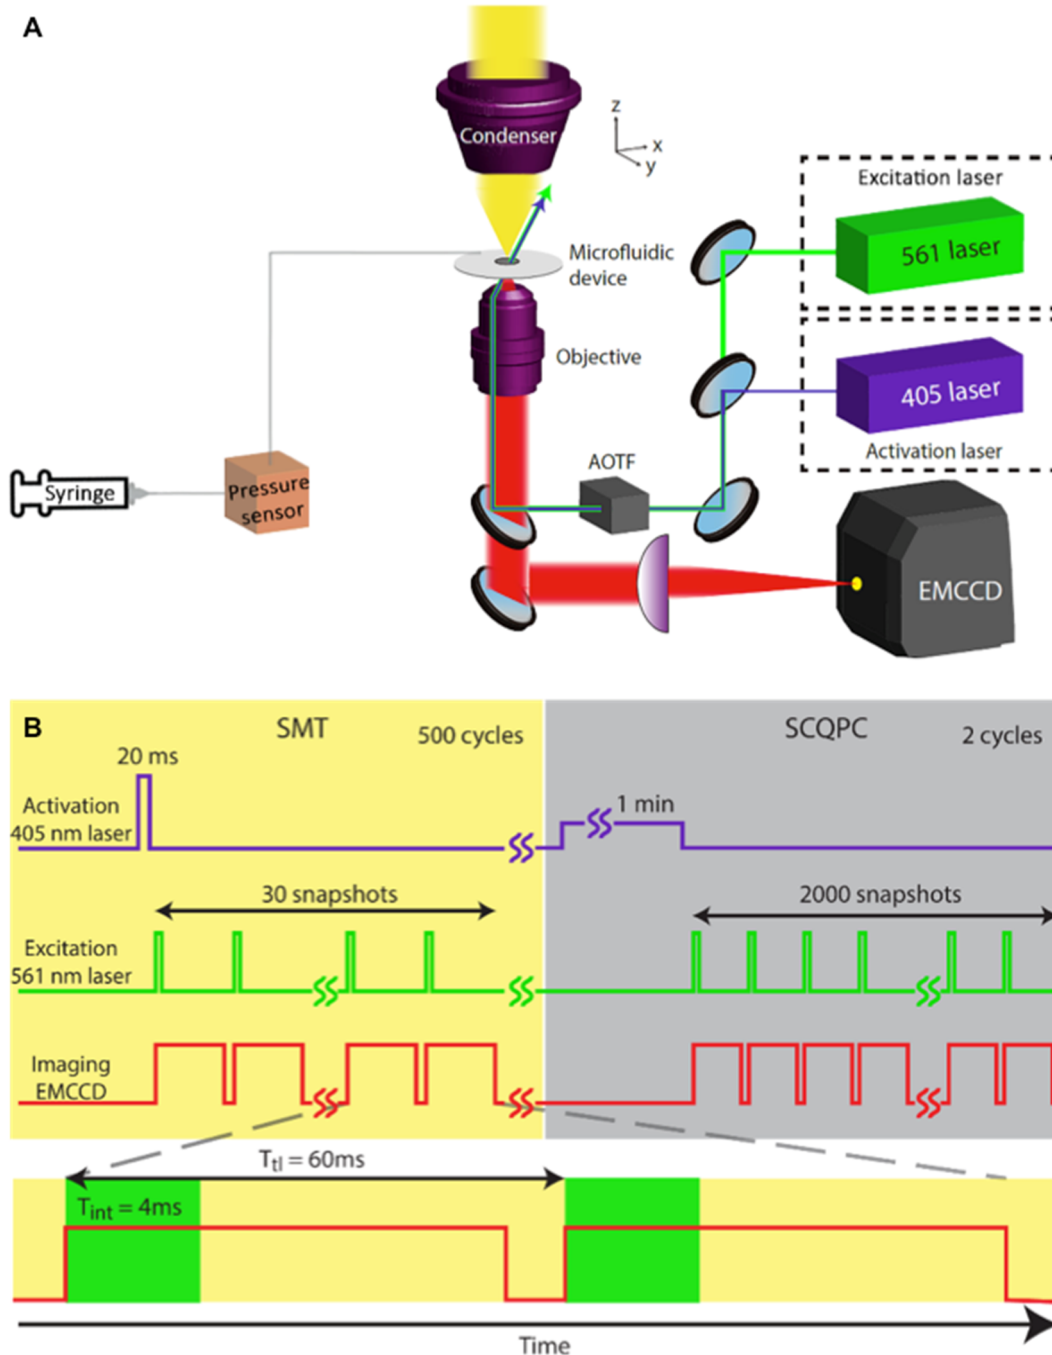

**Fig. S3.** Extrusion loading implemented with previously demonstrated PALM imaging (2, 4). (A) Schematic overview of imaging set-up. A syringe pump was used to apply fluidic pressure. Pressure was measured along the capillary tubing line prior to entering the microfluidic device. (B) Laser and camera timing diagram for SMT and SCQPC (described in section 1.9).

#### 1.4. Deformations of bacteria submitted to stepwise increases in extrusion loading

*E. coli* suspended in liquid media were submitted to extrusion loading (Fig. 1A-B) with an initial  $P_{ave}$  of 46 kPa ( $\Delta P$ : 11.55 – 37.73 kPa). Microscopy images of trapped bacteria were collected using bright-field microscopy (0.108  $\mu\text{m}$  per pixel, Fig. S1E). To induce a stepwise increase in extrusion loading on trapped cells, the applied fluidic pressure was increased (measured at the device inlet). The trapped cells were imaged at the larger applied pressure again using bright-field microscopy (Fig. S4A). The process was repeated for another stepwise increase in applied pressure, resulting in an image of the same trapped cells at three  $\Delta P$  magnitudes. Stepwise loading occurred over a short timeframe ( $\sim 19$  min) at room temperature to minimize the influence of cell growth on changes in cell length. Increases in applied  $\Delta P$  resulted in movement of bacteria farther into the tapered channels leading to a reduction in cell width (Fig. S4A-B). Additionally, cell length increased (Fig. S4B). These observations show that increased magnitude of extrusion loading results in reductions in tensile hoop strains, increases in tensile strain in the axial direction, and a net reduction in cell volume (Fig. 1C-D).

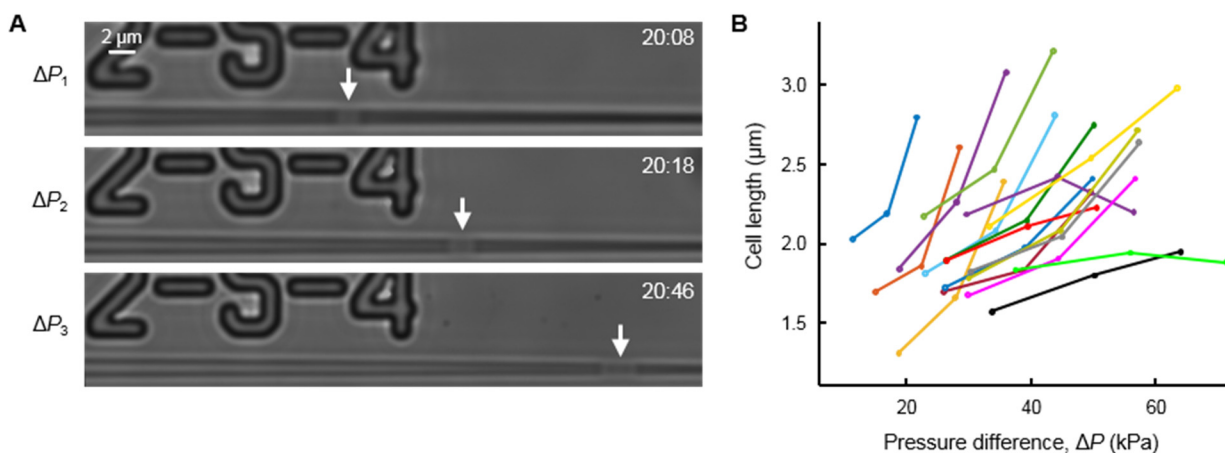

**Fig. S4.** Changes in cell dimensions in *E. coli* submitted to stepwise increases in extrusion loading. (A) Bright-field images of a trapped cell submitted to three magnitudes of extrusion loading (15.0 kPa, 22.5 kPa and 28.6 kPa top to bottom). Arrow: Trapped *E. coli* cell. (B) The length of trapped cells at each of the stepwise increases in pressure ( $n = 17$ ; lines connect measures of the same cell).

#### 1.5. Analytical model of cell envelope stress state

An analytical model was used to characterize the stress and strain states in an *E. coli* cell submitted to stepwise increases in extrusion loading. The model uses the thin-walled approximation and assumes an axisymmetric cell geometry. The cell contains a turgor pressure ( $P_t$ ) associated with osmolarity and is submitted to an upstream hydrostatic pressure ( $P_u$ ) and a downstream hydrostatic pressure ( $P_d$ ). The difference between upstream and downstream pressure ( $P_u - P_d$ ) is the pressure difference  $\Delta P$ . A normal pressure ( $P_{wall}$ ) is exerted by the channel wall on the cell, and a frictional stress ( $\tau$ ) associated with contact to the cell envelope is also present (Fig. S5A).

The stress and strain, and the change in turgor pressure of a bacterium at two loading configurations ( $\Delta P_1$  and  $\Delta P_2$ ), are considered (Fig. S5A). The cylindrical portion of the bacterium

(AA' to BB' in Fig. S5A) is referred to as 'trunk' and the ends caps as 'caps.' The cell envelope thickness is denoted by  $t$ . As the taper angle  $\alpha$  in the microfluidic channel is very small ( $\sim 0.5^\circ$ ), we assume uniform radius for the trunk.

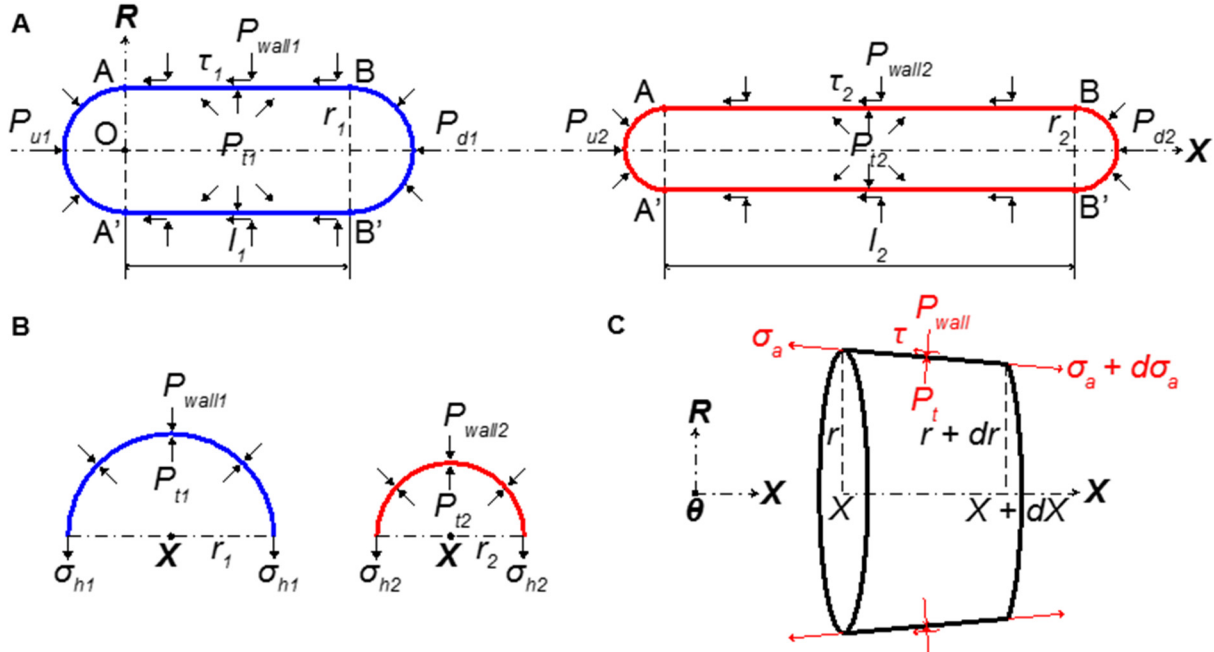

**Fig. S5.** Free body diagrams of a bacterium under extrusion loading. (A) Schematic of a bacterium trapped inside a channel at two applied pressures. The blue (left) bacterium is at lower applied pressure, and the red (right) one is at higher applied pressure. (B) The local force balance in the hoop direction. The black dots denote the axial axis. (C) The local force balance of a segment of a trapped bacterium in the axial direction.

We denote the displacement of the point  $X$  in the cell envelope as it moves from configuration 1 to configuration 2 as  $u$ , such that  $x = X + u$ . As the cell moves from configuration 1 to configuration 2, the axial strain  $\varepsilon_a$  and the hoop strain  $\varepsilon_h$  in the cell envelope are given by:

$$\varepsilon_a = du(X) / dX = u'(X) \quad \text{S[5]}$$

$$\varepsilon_h = \frac{r_2 - r_1}{r_1} \quad \text{S[6]}$$

We assume small strains and neglect bending of the cell envelope (5). The incremental tensile axial stress  $\delta\sigma_a$  and the incremental tensile hoop stress  $\delta\sigma_h$  between two configurations are given as:

$$\sigma_{a2} = \sigma_{a1} + \delta\sigma_a \quad \text{S[7]}$$

$$\sigma_{h2} = \sigma_{h1} + \delta\sigma_h \quad \text{S[8]}$$



The cell envelope is modeled as a linear elastic transversely isotropic material (6, 7) with hoop Young's modulus,  $E_h$ , on the transverse isotropic plane and the axial Young's modulus,  $E_a$ . The ratio between hoop and axial Young's modulus is described by the anisotropic coefficient  $\gamma = E_h / E_a$ . The Poisson's ratio in the axial direction is denoted by  $\nu_{ha}$ . The transversely isotropic constitutive law between incremental stresses ( $\delta\sigma_a$  and  $\delta\sigma_h$ ) and strains ( $\varepsilon_a$  and  $\varepsilon_h$ ) gives the following equations:

$$\delta\sigma_a = \frac{E_h}{\gamma - \nu_{ha}^2} (\varepsilon_a + \nu_{ha}\varepsilon_h) = \frac{E_h}{\gamma - \nu_{ha}^2} \left[ u'(X) + \nu_{ha} \frac{r_2 - r_1}{r_1} \right] \quad \text{S[9]}$$

$$\delta\sigma_h = \frac{E_h}{\gamma - \nu_{ha}^2} (\nu_{ha}\varepsilon_a + \gamma\varepsilon_h) = \frac{E_h}{\gamma - \nu_{ha}^2} \left[ \nu_{ha}u'(X) + \gamma \frac{r_2 - r_1}{r_1} \right] \quad \text{S[10]}$$

Local force balance in the hoop direction (Fig. S5B) for the two pressure configurations can be expressed as:

$$\sigma_{h1}(X) = \frac{r_1}{t} [P_{t1} - P_{wall1}(X)] \quad \text{S[11]}$$

$$\sigma_{h2}(X) = \frac{r_2}{t} [P_{t2} - P_{wall2}(X)] \quad \text{S[12]}$$

Axial force balance (Fig. S5C) is obtained by assuming a constant Coulomb friction coefficient  $f$  between the cell and channel walls, such that the shear friction stress was given by  $\tau = f \cdot P_{wall}(X)$ . The resulting axial force balances for both configurations are given in Equations S[13] and S[14], with higher-order incremental terms not included.

$$\frac{d\sigma_{a1}(X)}{dX} = \frac{f}{t} P_{wall1}(X) + \frac{\alpha}{r_1} [\sigma_{a1}(X) - \sigma_{h1}(X)] \quad \text{S[13]}$$

$$\frac{d\sigma_{a2}(X)}{dX} = \left\{ \frac{f}{t} P_{wall2}(X) + \frac{\alpha}{r_2} [\sigma_{a2}(X) - \sigma_{h2}(X)] \right\} (1 + u') \quad \text{S[14]}$$

Considering the cell as a single body, the axial forces from the pressure difference must be balanced by wall pressure and friction, which results in the following equations:

$$\hat{P}_{wall1} = \frac{1}{l_1} \int_0^{l_1} P_{wall1}(X) dX = \frac{r_1 \Delta P_1}{2l_1(f + \alpha)} \quad \text{S[15]}$$

$$\hat{P}_{wall2} = \frac{1}{l_2} \int_0^{l_2} P_{wall2}(X) (1 + u') dX = \frac{r_2 \Delta P_2}{2l_2(f + \alpha)} \quad \text{S[16]}$$

The change in turgor pressure between the two configurations can be assessed from the force balance in the hoop direction. By subtracting Equation S[11] from Equation S[12], then

integrating both sides of the equation across the length of the cell and using Equations S[10], S[15], and S[16], we obtain:

$$P_{i2} - P_{i1} = \frac{r_1(\Delta P_2 - \Delta P_1)}{2l_1(f + \alpha)} + \frac{tE_h}{r_1(\gamma - v_{ha}^2)} \left( v_{ha} \frac{l_2 - l_1}{l_1} + \gamma \frac{r_2 - r_1}{r_1} \right) \quad \text{S[17]}$$

Substituting values for pressure, radius, and Young's moduli within the experimental range, the right-hand side of Equation S[17] is always positive (i.e. increases in pressure difference result in increases in internal pressure). The increase in turgor pressure is consistent with observed reductions in cell volume during stepwise extrusion loading (Fig. 1C). Since the cell remains viable after loading, it is expected that the volume loss is predominately water. A reduction in water content would be expected to increase osmolarity and thereby increase turgor pressure.

Differentiating Equation S[7] and replacing the resulting terms with Equations S[9], S[11]-[14], and S[17] gives us Equation S[18], where  $M$  is given by Equation S[19] and  $B$  by Equation S[20].

$$u'' + Bu' = M \quad \text{S[18]}$$

$$M \triangleq \frac{(\gamma - v_{ha}^2)f}{tE_h} \left[ \frac{r_1(\Delta P_2 - \Delta P_1)}{2l_1(f + \alpha)} + \frac{tE_h v_{ha} \frac{l_2 - l_1}{l_1}}{r_1(\gamma - v_{ha}^2)} \right] + \frac{\alpha(v_{ha} - \gamma)\epsilon_h}{r_1} \quad \text{S[19]}$$

$$B \triangleq \frac{(f + \alpha)v_{ha} - \alpha}{r_1} \quad \text{S[20]}$$

The displacement ( $u$ ) and the axial strain ( $\epsilon_a$ ) distribution can be obtained by solving S[18] while noting that cell geometry requires  $[r_2 - r_1 = -u(0) \cdot \alpha]$  and  $[u(l_1) - u(0) = l_2 - l_1]$ . The axial strain distribution is found to be:

$$\epsilon_x = u'(X) = \frac{M}{B} - \frac{Ml_1 - B(l_2 - l_1)}{1 - e^{-B l_1}} e^{-BX} \quad \text{S[21]}$$

The axial strain can be shown to increase monotonically from the upstream end ( $X = 0$ ) to the downstream end ( $X = l_1$ ) of the trunk if we solve and use the results of the force balance at two end caps in the axial direction. The incremental axial stress is then obtained from Equations S[9] and S[21], which also exhibits a monotonically-increasing pattern from the upstream end to the downstream end of the cell trunk.

## 1.6. Finite element model for bacteria submitted to mechanical loading

The experimental results (Fig. 3C-D) indicate a response to both extrusion loading and loading through gel encapsulation. The analytical model described above, while providing insight into the stresses and strains generated by extrusion loading, has limited utility for comparing the two loading modes since many of the variables are not well characterized. Here, we generate finite element models to compare cell envelope stress states between the two loading modes.

Characterization of the stress and strain states in the cell envelope during extrusion loading was performed using nonlinear finite element analysis. A finite element model of a bacterium submitted to extrusion loading was developed using Abaqus (CAE 6.9-EF2, Dassault Systems, Providence, RI, USA). An axisymmetric model was generated in which the cell envelope consisted of solid elements. The use of solid elements constrains the model to consider situations with a positive turgor pressure (a reasonable assumption given the increases in internal pressure during extrusion loading, see above). The trunk of the cell envelope was modeled as transversely isotropic (see above section). The Poisson's ratio was modeled as 0.3 on the isotropic plane and as 0.34 in the hoop/axial direction (8). The cell end caps were assigned isotropy, with the Young's modulus set as the average of the Young's moduli in the hoop and axial direction of the trunk. The Poisson's ratio in the end caps was assumed as 0.3. Channel walls were represented as rigid surfaces with dimensions matched to the microfluidic device design. Contact between the cell envelope and the channel walls was simulated using a surface-to-surface contact. Coulomb friction was applied between the cell envelope and channel walls. Each finite element model consisted of 103,680 four-node bilinear quadrilateral elements (16 elements across the cell thickness, CAX4 elements with geometric nonlinearities included). The thickness of the cell envelope  $t$  was assumed to be 4 nm (6, 9).

Extrusion loading was simulated in two steps (Fig. S6A). In the initial step, the cell envelope is inflated with a turgor pressure characteristic of the free-floating state ( $P_{t,0}$ ). Although reports of turgor pressure vary dramatically in the literature, cell width is highly constrained (10) and has small variability in the strain of *E. coli* used in this experiment (2). Hence, we expect a relationship between unstressed width  $w_0$ , turgor pressure, and the Young's modulus of the cell envelope. The unstressed width at a given turgor pressure and cell envelope Young's modulus were determined iteratively to achieve a final width that was the same as the cell width of free-floating *E. coli*.

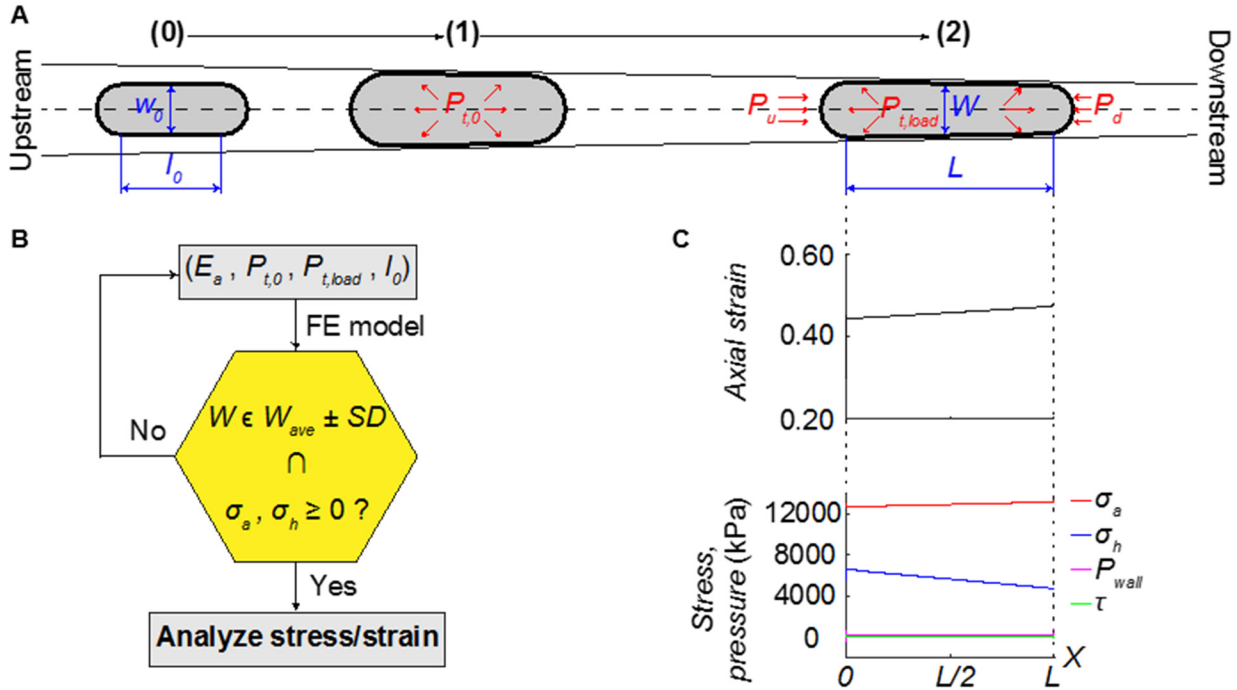

**Fig. S6.** Parametric finite element methods, and the stress and strain results. (A) Schematic of the finite element model. Numbers mark the steps in a simulation. (B) Flowchart of the parametric analysis. Finite element model outputs cell width  $W$ , which is compared to the experimental width plus and minus one standard deviation,  $W_{ave} \pm SD$  (Table S2). Axial and hoop stresses are checked whether they are tensile. We analyze the simulative stress and strain states only if these two conditions are achieved. (C) An example of the simulative stress and strain distributions that match experimental findings. Normal pressure (pink) and axial (red), hoop (blue), and shear (green) stresses are shown for a typical case. Here the variables are:  $E_a = 25$  MPa,  $P_{t,0} = 150$  kPa,  $P_{t,load} = 270$  kPa,  $l_0 = 1200$  nm, under applied pressure  $\Delta P = 15.4 - 23.1$  kPa,  $P_{ave} = 30.0$  kPa.

In the second step of the simulation, upstream and downstream pressure were included and the internal pressure was increased to  $P_{t,load}$ . Stabilization control was used to allow for small rigid body motion of the cell envelope within the channels and was confirmed to not affect final stress and strain.

As many of the parameters used in the finite element model have not yet been well defined experimentally (Table S1), we performed a parametric analysis to identify the combination of descriptive variables that result in deformations similar to what is seen experimentally (Fig. S6B). Key input parameters for the model include Young's moduli, initial turgor pressure, and turgor pressure after deformation. Finite element model results were compared to experimentally-measured cell widths and lengths with a known pressure difference  $\Delta P$  (data from Table S2). Cell width was not highly variable in this strain of *E. coli*, but cell length varied considerably depending on the cell cycle. For this reason, final deformed cell width was used as the primary indicator of a finite element model result consistent with experimental findings. If the deformed cell width was within one standard deviation of the experimental cell width, the finite element model result was accepted. The parametric analysis was performed with the following parameter values: the Young's modulus in the hoop direction  $E_h$  was two times larger than the Young's modulus in the axial direction  $E_a$  (6, 7). The friction coefficient  $f$  was estimated from the global force balance on the cell envelope in the axial direction of a trapped cell. When we ran simulations with  $P_{t,0}$  as 100, 150, and 200 kPa,  $f$  was estimated to be 0.0039,

0.0026, and 0.0020, respectively. The unstressed cell length  $l_0$  can also affect how far a cell travelled downstream into the tapered channel, affecting the final cell width, so  $l_0$  was parameterized as well. Although the amount of initial contact between the cell envelope and the channel walls in the first step of the simulation can vary based on the axial position of the cell within the tapered channel, variation in the starting position in the channel had little effect on final cell width. A change of 78% in the starting position of the cell in the channel resulted in the same deformation of the cell.

The stress and strain states from the finite element simulations (Fig. S6C) showed a pattern in stress magnitude consistent with analytical results (see above section). The axial strain increased monotonically from the upstream end to the downstream end along the cell length. The parameter ranges that matched experimental findings suggested greater turgor pressure in the bacteria submitted to larger extrusion loading (Table S3), which is in agreement with the conclusion from the analytical model (see above section).

The stress and strain states of bacteria under extrusion loading were compared to bacteria under agarose gel encapsulation (see “1.14. Agarose embedding assay of cell growth,” Table S4). During elongation of a single cell, material is added to the cell envelope, thereby increasing cell length. When encapsulated in a stiff gel, the axial extension of the cell during growth is constrained (Fig. S13A). The cell envelope is typically under tension due to turgor. The presence of the gel results in a reduction in axial tensile stresses in the bacterial cell envelope ( $l_0$ ). As there is typically no expansion of *E. coli* in the hoop direction, hoop stress in an encapsulated cell remains the same as hoop stress in a free-floating cell. We modeled bacteria using a transversely isotropic linear elastic constitutive model (see section 1.5 above) with applied turgor pressure and axial compressive forces  $P_{gel}$  (applied on the cell poles as the cell grows). The resulting strain tensor is given in Equation S[22], where  $\nu$  is the Poisson’s ratio in the isotropic plane,  $\nu_{ah}$  and  $\nu_{ha}$  are the transverse direction Poisson’s ratio of the cell envelope,  $\sigma_{a,0}$  is the axial stress,  $\sigma_{h,0}$  is the hoop stress, and  $\sigma_{r,0}$  is the radial stress of a free-floating cell calculated from a thin-walled pressure vessel model.

$$\begin{pmatrix} \varepsilon_a \\ \varepsilon_h \\ \varepsilon_r \end{pmatrix} = \begin{pmatrix} 1/E_a & -\nu_{ha}/E_h & -\nu_{ha}/E_h \\ -\nu_{ah}/E_a & 1/E_h & -\nu/E_h \\ -\nu_{ah}/E_a & -\nu/E_h & 1/E_h \end{pmatrix} \begin{pmatrix} \sigma_{a,0} - P_{gel} \\ \sigma_{h,0} \\ \sigma_{r,0} \end{pmatrix} \quad \text{S[22]}$$

Using a set of material properties that were consistent with extrusion loading experimental results (Table S3), we compared the cell envelope stress states during extrusion loading with those during gel encapsulation. The normal stresses generated by extrusion loading and gel encapsulation differ considerably (Table S4). Extrusion loading leads to increased axial stresses and reduced hoop stresses while gel encapsulation results in reductions in axial stress and negligible changes in hoop stress. Although the normal stresses are very different, decomposing the three-dimensional stress state into hydrostatic and octahedral shear components shows that both loading modes result in increases in octahedral shear stress (Fig. 3C-D, Fig. S7).

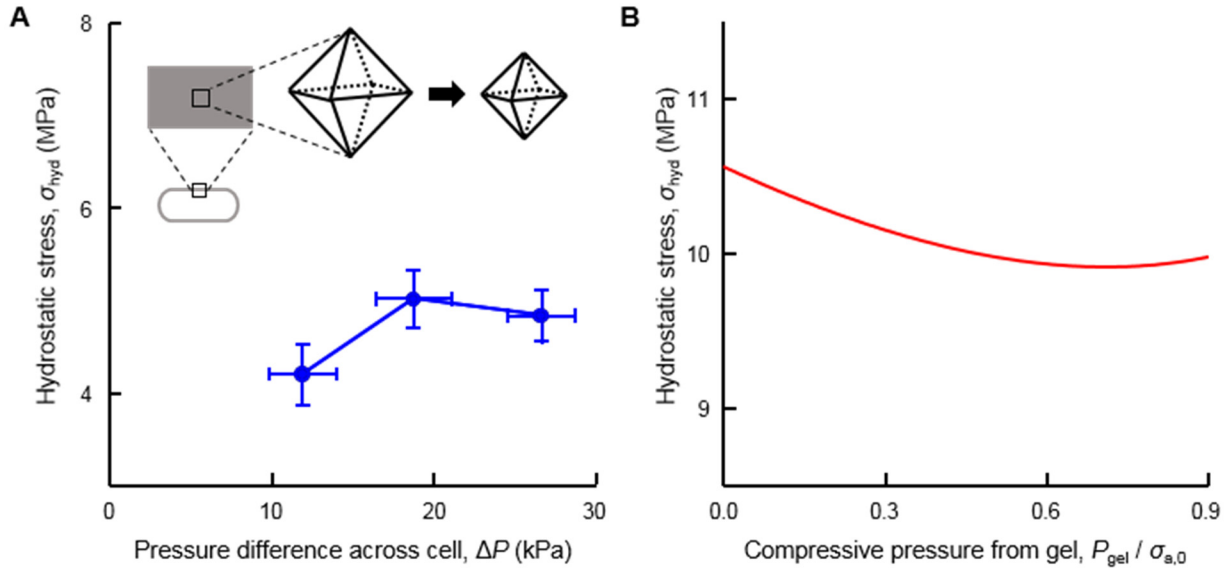

**Fig. S7.** (A) Hydrostatic stresses (inset) within the cell envelope are not correlated with the magnitude of extrusion loading ( $\Delta P$ ). Inset: An illustration of the effects of hydrostatic stresses on an element within the cell envelope. Hydrostatic compression causes a reduction in volume but does not change shape (compare to octahedral shear stresses in Fig. 3C inset). (B) Hydrostatic stresses in the cell envelope show only a slight negative trend with increases in compressive pressure generated by agarose encapsulation.

Extrusion loading and agarose encapsulation do not cause increases in biaxial stress, the primary form of membrane tension required to open stretch activated channels (11), and is therefore less capable of opening stretch-activated mechanosensitive channels in the cell membrane (Fig. S8).

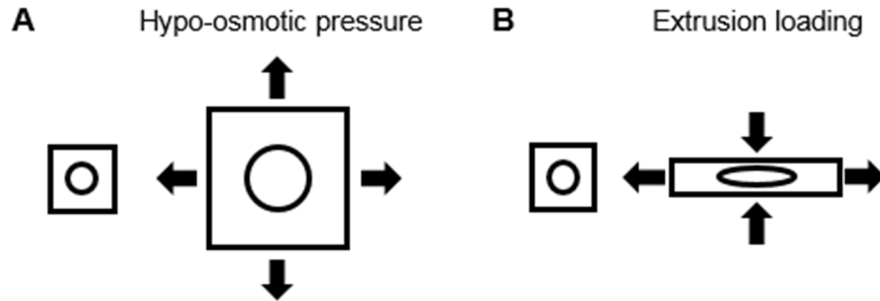

**Fig. S8.** (A) Hypo-osmotic pressure applies biaxial tension that stretches open a segment of the cell envelope, enabling opening and function of stretch activated channels. (B) Extrusion loading applies tension in one direction but compression in another direction and is therefore not as effective at opening stretch activated channels (the net mechanical stress in both directions remains tensile due to large tensile stresses generated by turgor).

**Table S1.** Parameters for the cell envelope in the finite element model

| Parameter    | Definition                                 | Parameter Range     | Reported Range             |
|--------------|--------------------------------------------|---------------------|----------------------------|
| $E_a$        | Axial Young's modulus                      | 20 – 60 MPa         | 20 – 150 MPa (6, 7, 12-16) |
| $P_{t,0}$    | Turgor pressure prior to extrusion loading | 100, 150, 200 kPa   | 30 – 300 kPa (7, 17, 18)   |
| $P_{t,load}$ | Turgor pressure during extrusion loading   | $P_{t,0} - 500$ kPa | –                          |
| $l_0$        | Unstressed cell length                     | 1000 – 2400 nm      | –                          |

**Table S2.** Applied pressure difference and cell dimensions for cells shown in Fig. 2A (with different  $\Delta P$  binning)<sup>a</sup>

| $P_{ave}$ (kPa) | $\Delta P$ (kPa) | $n$ | $P_{u,ave}$ (kPa) | $P_{d,ave}$ (kPa) | $W_{ave} \pm SD$ (nm) | $L_{ave} \pm SD$ (nm) |
|-----------------|------------------|-----|-------------------|-------------------|-----------------------|-----------------------|
| 30.0            | 7.7 – 15.4       | 95  | 37.73             | 22.25             | 684 ± 165             | 2762 ± 438            |
|                 | 15.4 – 23.1      | 146 | 42.16             | 17.82             | 697 ± 134             | 2617 ± 467            |
|                 | 23.1+            | 296 | 47.28             | 12.70             | 645 ± 104             | 2596 ± 457            |

<sup>a</sup>Note: the parametric analysis identifies sets of unknown parameters (turgor pressure, Young’s modulus, and cell length at unstressed state) that result in a cell width similar to what is seen experimentally.  $P_{u,ave}$  is the average upstream pressure and  $P_{d,ave}$  is the average downstream pressure for trapped cells.  $W$  is the width of the cell expressed at mid-cell (halfway between the upstream and downstream ends of the cell) and  $L$  is the length of the cell trunk (not including caps).

**Table S3.** An example of parameter ranges using fixed and assumed values for the Young’s modulus ( $E_a$ ) and initial turgor pressure ( $P_{t,0}$ ). Values were assumed from literature (see Reported Range in Table S1)

| $P_{ave}$ (kPa) | $\Delta P$ (kPa) | $E_a$ (MPa) | $P_{t,0}$ (kPa) | $P_{t,load}$ (kPa) | $l_0$ (nm)  |
|-----------------|------------------|-------------|-----------------|--------------------|-------------|
| 30.0            | 7.7 – 15.4       | 25          | 150             | 150 – 230          | 1400 – 2400 |
|                 | 15.4 – 23.1      | 25          | 150             | 190 – 280          | 1200 – 2000 |
|                 | 23.1+            | 25          | 150             | 260 – 300          | 1200 – 1600 |

**Table S4.** The responses of stress and strain to increases in external loading of the two loading modes<sup>a</sup>

| Loading mode              | $\sigma_a$ | $\sigma_h$ | $\sigma_r$ | $\tau$ | $\sigma_{hyd}$ | $\tau_{oct}$ | $\varepsilon_{hyd}$ | $\gamma_{oct}$ |
|---------------------------|------------|------------|------------|--------|----------------|--------------|---------------------|----------------|
| Extrusion loading         | ↑          | ↓          | ↓          | ↑      | –              | ↑            | –                   | ↑              |
| Agarose gel encapsulation | ↓          | –          | –          | –      | ↓              | ↑            | ↓                   | –              |

<sup>a</sup>Note: “–” denotes no change. The ↑ symbol indicates an increase in the specified stress or strain with an increase in the loading (either from greater  $\Delta P$  or increased agarose content), ↓ is a decrease in stress or strain with increased loading. Stresses examined were axial ( $\sigma_a$ ), hoop ( $\sigma_h$ ), radial ( $\sigma_r$ ), shear ( $\tau$ ), hydrostatic ( $\sigma_{hyd}$ ), and octahedral shear ( $\tau_{oct}$ ). Strains examined were hydrostatic ( $\varepsilon_{hyd}$ ) and octahedral shear ( $\gamma_{oct}$ ).

## 1.7. Bacterial strain construction

All strains used in this study were derived from the *E. coli* BW25113 strain (CGSC# 7739 Keio Collection, Yale; genotype: F<sup>-</sup>,  $\Delta(araD-araB)567$ ,  $\Delta lacZ4787(::rrnB-3)$ ,  $\lambda^-$ , *rph-1*,  $\Delta(rhaD-rhaB)568$ , *hsdR514*). The *cusA<sup>mE</sup>* (i.e., CALMF) strain was constructed and characterized in our previous work (4). Briefly, CALMF (*c<sub>usA</sub>*-linker-*mEos3.2-FLAG*) was created via lambda Red recombineering, where a short, flexible linker L of 10 amino acids (sequence = AGSAAGSGEF) was used to connect *mEos3.2-FLAG* (a monomeric, irreversibly photoconvertible fluorescent protein *mEos3.2* (19, 20) with a C-terminal FLAG tag) to the C-terminus of *CusA* at its chromosomal locus (4). This *CusA<sup>mE</sup>* fusion protein is functional and stays intact, as shown by cell growth assays and Western blot (4).

## 1.8. Cell sample preparation

**For single-molecule imaging:** *CusA<sup>mE</sup>* (i.e., CALMF) cells were grown in LB with chloramphenicol (25  $\mu$ g/mL, USBiological) for 18 h in 37 °C with shaking (250 rpm). From this culture, a 1:100 dilution was prepared in LB containing chloramphenicol (25  $\mu$ g/mL). This diluted 10 mL culture was incubated at 37 °C for 4 h (reaching OD<sub>600</sub> = 0.4) with shaking (250 rpm). The cells were centrifuged (4500 rpm, 4 °C) for 10 min. The supernatant was removed, and the resulting cell pellet was re-suspended in 10 mL of M9 medium supplemented with 8%

v/v 50X MEM amino acids (GIBCO, cat. #: 11130051), 4% 100X MEM vitamins (GIBCO, cat. #: 11120052), and 0.4% glucose (Sigma-Aldrich, cat. #: G7528). The liquid suspension of cells was loaded into the microfluidic device as described in section 1.3.

**For cell growth under copper stress in device:** For cell samples requiring copper stress (e.g., in measuring the rate of cell elongation and division), CALMF cell cultures were prepared as described above. The pellet was re-suspended in 10 mL of LB, and 25  $\mu$ L of copper sulfate (Mallinckrodt) was added to yield a 2.5 mM copper solution. This concentration of copper impacts *E.coli* cell growth but still renders the cells viable.

### 1.9. Single-molecule tracking (SMT) and single-cell quantification of protein concentration (SCQPC)

SMT (21-27) via stroboscopic imaging and SCQPC were performed as previously described on an inverted fluorescence microscope (Olympus IX71; Fig. S3) (2, 4). For SMT, the cells were first illuminated with a 405 nm laser (1–10 W/cm<sup>2</sup>) for 20 ms to photoconvert a single mEos3.2 molecule (or none) from its green fluorescent form to its red fluorescent form. A series of 30 pulses of a 561 nm laser (21.7 kW/cm<sup>2</sup>) in epi-illumination mode with pulse duration  $T_{\text{int}} = 4$  ms and time lag  $T_{\text{tl}} = 60$  ms were then used to excite the red mEos3.2. The resulting red mEos3.2 fluorescence was imaged by an EMCCD camera (Andor Technology, DU-897E-CSO-#BV), which was synchronized with the 561 nm laser pulses. This imaging scheme was repeated for 500 cycles for each field of view.

After the SMT step, SCQPC was performed on the same cells, in which the cells were illuminated with the 405 nm laser (1–10 W/cm<sup>2</sup>) for 1 min to photoconvert all remaining mEos3.2 molecules, followed by 561 nm laser illumination for 2000 frames with the same laser power density and exposure time as in the SMT step to quantify the number of remaining mEos3.2 molecules. This 405-illumination and 561-excitation sequence was repeated once more to ensure all mEos3.2 molecules had photobleached. All CusA concentrations cited in the study correspond to those of CusA trimers, i.e., one-third of the total mEos3.2 concentration, and are corrected for the photoconversion efficiency (42%) of mEos3.2 as previously described (2, 28, 29).

### 1.10. Single-molecule imaging data analysis

The boundary of each cell inside tapered channels was determined from the optical transmission image. Due to the interference of tapered channels, automated detection of the cell boundary in the image was problematic, and a manual approach was used. An ellipse was hand-drawn to initially outline crudely each cell's boundary, which was then fitted with a cell-shape model of a cylinder with two hemispherical caps (2, 30). The resulting fitted cell boundary was then used as a mask to define the region of interest (ROI) for each cell in the corresponding fluorescence image. Fluorescence spots of individual CusA<sup>mE</sup> molecules from SMT were identified within each ROI [i.e., if the pixel intensities of these spots were greater than a user-defined threshold (the mean pixel intensity value + 4 standard deviations of the whole image)], fitted with a 2-D Gaussian point spread function, and position-localized to nanometer precision (typically ~40 nm precision), as previously described (2).



To obtain more precise measurements of the boundary of each cell, we took horizontal and vertical line profiles of each cell's optical transmission image (Fig. S9). For the horizontal line profile, the midpoints of each of the two curves surrounding the cell were used to determine the cell length. For the vertical line profile, the midpoints of the two taper channel walls were used to determine the width. In cases of ambiguity, the lengths and widths obtained from line profiling were each dilated by one pixel (135.4 nm) in each direction. From these refined measurements, the lengths and widths of the cells can be accurately reported (Table S5). The more precise measurements of cell lengths and widths were used to generate refined cell boundaries (i.e., new ROIs), which were used to clean up the fluorescence localizations of individual CusA<sup>mE</sup> molecules. Fluorescence localizations outside these new ROIs were eliminated as false hits.

We further examined the cells with higher numbers of detected trajectories (i.e., the top 5% cells). If the cell dominantly had fluorescence localizations that appear to stay at the same location (i.e., within ~270 nm, which is about diffraction-limited spot size) repetitively for long periods (i.e., for an average of 8 minutes), the cell was removed, as these apparent stationary bright objects are likely from dust particles. For all 1337 cells analyzed, a total of 10 cells (i.e., less than 1%) were discarded due to the presence of these dust-particle-like behaviors.

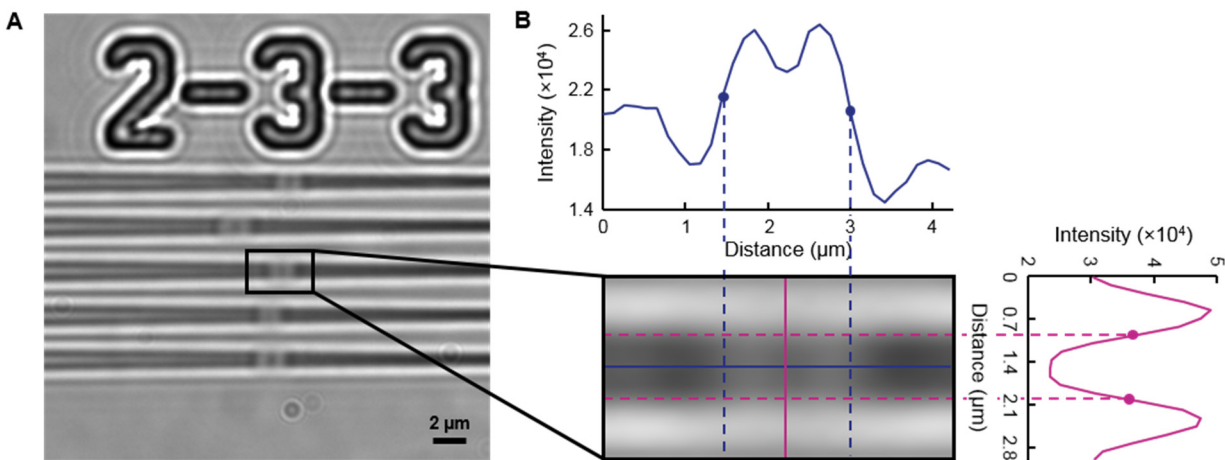

**Fig. S9.** Line profiling for determining accurate cell boundary. (A) Exemplary transmission image of cells trapped in tapered channels. (B) Horizontal (blue) and vertical (pink) line profiling of a cell from a (lower left). For the horizontal line profile (upper), the midpoints (blue dots) of each of the two curves surrounding the cell were used to determine the cell length. For the vertical line profile (right), the midpoints (pink dots) of the two taper channel walls were used to determine the cell width.

**Table S5.** Applied pressure difference and cell dimensions for cells shown in Fig. 2C-F<sup>a</sup>

| $P_{ave}$ (kPa)                     | $\Delta P$ (kPa) | $n$ | $L_{ave} \pm SD$ ( $\mu\text{m}$ ) | $W_{ave} \pm SD$ ( $\mu\text{m}$ ) |
|-------------------------------------|------------------|-----|------------------------------------|------------------------------------|
| 0.0                                 | 0.0              | 284 | $1.56 \pm 0.33$                    | $1.00 \pm 0.13$                    |
| 12.5                                | $3.8 \pm 1.7$    | 205 | $2.04 \pm 0.51$                    | $1.01 \pm 0.16$                    |
|                                     | $8.9 \pm 1.1$    | 199 | $2.22 \pm 0.44$                    | $0.71 \pm 0.13$                    |
|                                     | $11.9 \pm 0.5$   | 188 | $2.22 \pm 0.53$                    | $0.63 \pm 0.08$                    |
| 30.0                                | $3.3 \pm 2.6$    | 189 | $2.24 \pm 0.47$                    | $0.88 \pm 0.16$                    |
|                                     | $14.5 \pm 3.1$   | 194 | $2.27 \pm 0.48$                    | $0.72 \pm 0.13$                    |
|                                     | $25.7 \pm 2.8$   | 349 | $2.28 \pm 0.45$                    | $0.61 \pm 0.07$                    |
| All 12.5 and 30.0 kPa data combined | $4.3 \pm 2.6$    | 481 | $2.14 \pm 0.49$                    | $0.91 \pm 0.19$                    |
|                                     | $11.6 \pm 1.8$   | 438 | $2.24 \pm 0.49$                    | $0.67 \pm 0.12$                    |
|                                     | $24.7 \pm 3.7$   | 408 | $2.29 \pm 0.46$                    | $0.62 \pm 0.08$                    |

<sup>a</sup>:  $P_{ave}$  denotes the average pressure applied to the cells;  $\Delta P$  is the pressure difference experienced across the cell;  $n$  represents the number of cells;  $L$  is the length of the cell as calculated from line profiling;  $W$  is the width of the cell expressed at mid-cell (halfway between the upstream and downstream ends of the cell) as calculated from line profiling; and SD is standard deviation.

### 1.11. Quantification of stage drift: it is insignificant within our experimental time.

To check and ensure that our microscope stage did not drift significantly during our imaging — each fluorescence imaging movie was acquired over  $\sim 20$  minutes, consisting of SMT ( $\sim 15$  min) and 2 rounds of SCQPC ( $\sim 2$  min each), we took the optical transmission images of our device containing the cells before and after each movie was recorded (Fig. S10A). Our device had numerical labels etched in, and each transmission image contained at least one fully-intact symbol from these labels (number or hyphen), which acted as reference position markers. Upon selecting the transmission image of interest, the Canny edge detection algorithm in MATLAB was used to determine all of the edges in the entire image (Fig. S10B). A mask was applied to include all the edges surrounding the position marker of interest. All connected regions within this mask were filled, and the region with the maximum number of pixels (i.e., greatest area) was identified (Fig. S10C). The centroid position (geometric center) of this identified region was calculated (Fig. S10C-D). If multiple symbols were present in one transmission image, multiple centroids were determined, and their averages were used as position markers.

Upon analyzing the hundreds of centroid positions over many imaging areas, the average stage drifts in the  $x$  and  $y$  directions are  $29.3 \pm 27.6$  nm and  $44.3 \pm 37.8$  nm, respectively, over the duration of one movie ( $\sim 20$  min), corresponding to average drift rates of  $0.28 \pm 0.028$  and  $0.43 \pm 0.034$  nm  $\text{s}^{-1}$  (Fig. S10E). Considering the localization precision of our single-molecule imaging is  $\sim 40$  nm, the magnitude of stage drift falls within the localization error. Thus, no subsequent steps were needed to correct for stage drift in analyzing the single-molecule tracking trajectories.

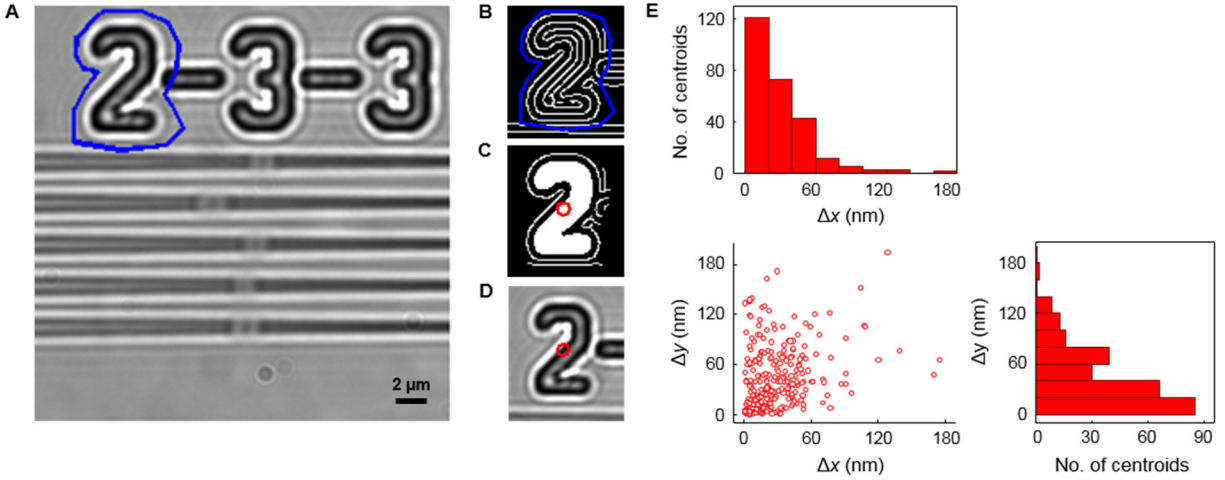

**Fig. S10.** Edge detection and centroid determination. (A) Transmission image containing the taper set label “2–3–3” etched into the imaging wafer. Blue dots connected by white lines indicate the selection of the mask for the desired symbol (position marker). (B) The Canny edge detection algorithm selects the edges of the entire transmission image. The intensity values are converted into binary. (C) Selection of the edges within the mask indicated in panel B, followed by filling in the connected regions. The filled region with the maximum number of pixels (i.e., the greatest area) — i.e., the solid white innermost region — is identified. The centroid position (i.e., the geometric center) of this identified region is calculated, depicted here by the red superimposed circle. This process was repeated for each fully-intact symbol on each set of transmission images taken before and after the recording of each movie. (D) Overlay of the centroid position (red circle) determined from C on the original transmission image of A. (E) Histograms (upper left and bottom right) and scatter plot (lower left) of the stage drift in  $x$  and  $y$  direction for all analyzed centroids.

### 1.12. Analysis of diffusive behaviors of CusA<sup>mE</sup> in cells to determine its diffusive states and the associated diffusion constants and fractional populations

From SMT data, the diffusive behaviors of CusA<sup>mE</sup> can be extracted by analyzing the probability distribution function (PDF) of the displacement length  $r$  per time lapse ( $T_{tl}$ ) of each tracked CusA<sup>mE</sup> molecule, as we reported in our previous study of CusCBA assembly (4). Only the first displacement was used here from each tracking trajectory to avoid biasing toward long trajectories (2). The experimentally determined histogram of  $r$  (i.e., un-normalized PDF of  $r$ ) was initially transformed via an inverse transformation method ITCDD (4, 31, 32) to deconvolute out the cell confinement effect that distorts the displacement distribution and was then fitted by a linear combination of two terms, each representing a diffusive state that follows the Brownian diffusion model (Equation S[23]) (the actual fitting was done on the integrated form of the PDF to be numerically more robust):

$$\text{PDF}(r, T_{tl})_{\text{unnormalized}} = N \left[ \frac{A_m r}{2D_m T_{tl}} \exp\left(-\frac{r^2}{4D_m T_{tl}}\right) + \frac{A_s r}{2D_s T_{tl}} \exp\left(-\frac{r^2}{4D_s T_{tl}}\right) \right] \quad \text{S[23]}$$

where  $N$  is a scaling factor,  $D$  is diffusion constant,  $A$  is fractional population, and the subscripts  $m$  and  $s$  refer to the mobile (faster) and stationary (slower) populations, where  $A_m + A_s = 1$ . This

analysis was applied to all PDF( $r$ )'s across all experimental conditions to evaluate how the fractional populations and diffusion constants of the two states varied.

Upon ITCDD transformation of the original experimental PDF, the resulting distribution of displacement lengths are fitted by the Brownian diffusion model as in Equation S[23] above. However, we often observe that after ITCDD, there are some displacement lengths that are too large to be reasonable for a membrane protein (4) and need to be discarded. To determine the appropriate upper limit of displacements for the transformed PDF, we performed simulations of a statistically-saturated number of diffusion trajectories (5000) with a given diffusion constant on the membrane of a cell matching the average cell geometry of our experimental data. The resulting simulated displacements were transformed via ITCDD, from which the diffusion constant was extracted from Brownian diffusion model analysis. Each simulation was repeated four times for each diffusion constant input (diffusion constant inputs of 0.1 to 1.1  $\mu\text{m}^2 \text{s}^{-1}$  were sampled). The extracted diffusion constants from the ITCDD-transformed simulations very well recover the intrinsic diffusion constant input, validating our ITCDD method (Fig. S11A), which we showed previously in our method paper (31). Next, the displacement distributions from the simulations were truncated in 0.1  $\mu\text{m}$  increments at the 95% population of the theoretical PDF (i.e., the displacement threshold  $r_{\text{upper}}$  @ 95%). We chose 95% confidence to be better than our typical experimental uncertainty. This established our calibration curve for the upper-limit truncation on the ITCDD-transformed PDF (Fig. S11B, red points). We then iteratively truncated each of our ITCDD-transformed experimental PDF (going from high to low upper limit) until the value of the extracted experimental diffusion constant of the mobile faster state agreed with the expected diffusion constant from the calibration curve at the same truncation  $r_{\text{upper}}$  (i.e., crossed the red calibration curve, Fig. S11B). The PDF analysis results at this  $r_{\text{upper}}$  value were subsequently taken as our final results (Fig. S11C).

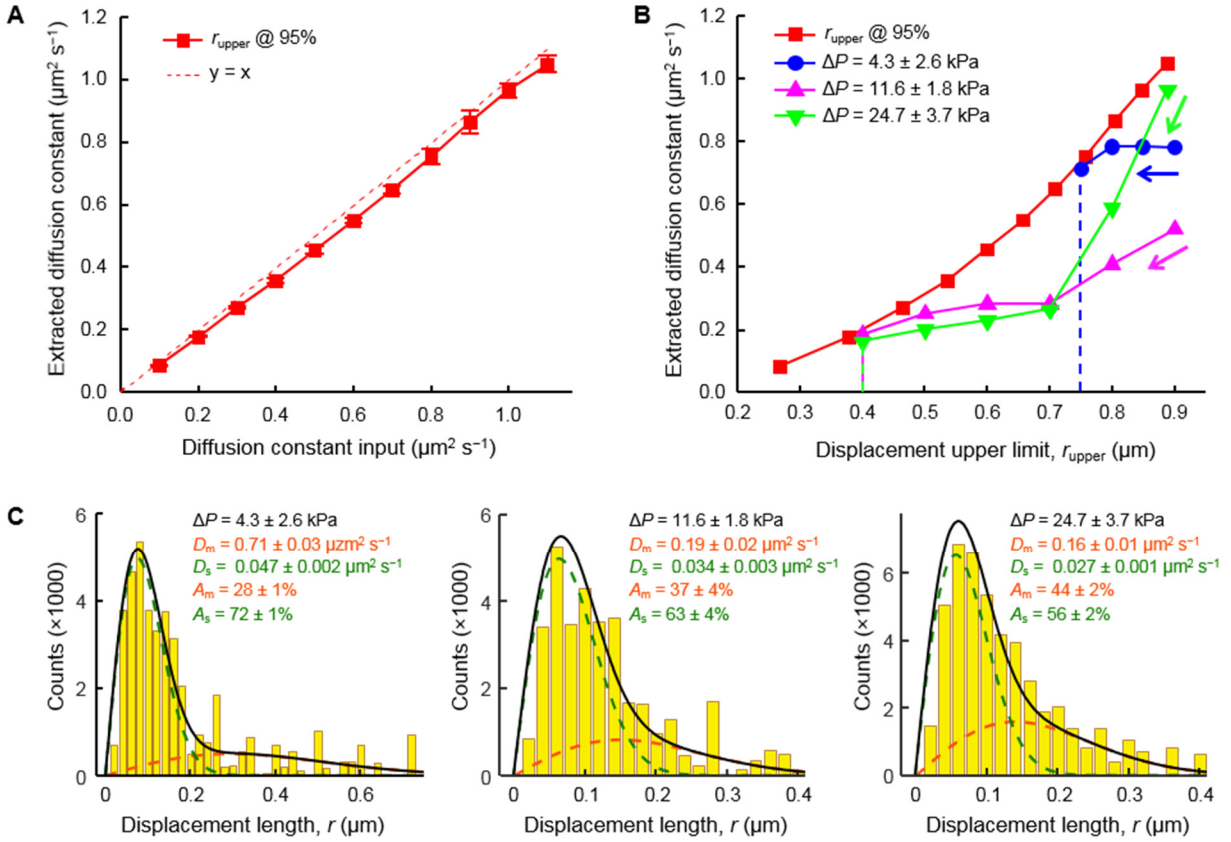

**Fig. S11.** Truncation and analysis of ITCDD-transformed PDF across a range of  $\Delta P$ . (A) Diffusion constant input plotted against extracted diffusion constant fitted from simulated displacements that were transformed via ITCDD and truncated at 95% population inclusion. Each red square represents the average extracted diffusion constant from four simulations; y-error bars are s.d. For reference, a diagonal line ( $y = x$ ) was plotted to illustrate that the values of the extracted diffusion constants from the simulations very closely align with the original diffusion constant inputs. (B) The  $r_{\text{upper}}$  value at 95% of ITCDD-transformed PDF vs. the extracted diffusion constant (red points). The blue, pink, and green curves represent the three  $\Delta P$  groups of the experimental data. The ITCDD-transformed PDF from each group was truncated iteratively in the direction of high to low  $r_{\text{upper}}$  (indicated by the direction of the color-corresponding arrows) until the extracted diffusion constant meets the red calibration curve. The corresponding upper limit of displacement (as indicated by each color-corresponding vertical dashed line) was used for subsequent analysis of the ITCDD-transformed PDF. (C) ITCDD-transformed PDF( $r$ ) generated from CusA<sup>me</sup> SMT data at  $\Delta P = 4.3 \pm 2.6$  kPa,  $11.6 \pm 1.8$  kPa, and  $24.7 \pm 3.7$  kPa. Each ITCDD-corrected PDF (yellow bars) can be sufficiently fitted with two Brownian diffusion states (Eq. S23): a mobile disassembled state (orange dashed line) and an almost stationary assembled state (green dashed line). The solid black line denotes the overall fit. Diffusion constants for the mobile ( $D_m$ ) and stationary ( $D_s$ ) states and the corresponding fractional populations ( $A_m$ ,  $A_s$ ) are denoted. Errors are s.d. The diffusion constants and mobile fractional populations are also presented as black data points in Fig. 2D and 2C, respectively, in the main text. The PDF on the far right is the same as Fig. 2B in the main text.

### 1.13. Determination of effective disassembly rate constant

The disassembly rate constant of CusA from the CusCBA complex was determined by analyzing the distribution of microscopic residence times  $\tau$  of single CusA<sup>me</sup> molecules at the stationary state (i.e., assembled state) (Fig. S12); these single-molecule residence times were

obtained by up-thresholding the displacement vs. time trajectories. Two different methods are described below.

In the first method (Method 1), the displacement threshold  $r_0$  ( $\approx 100$  nm) was determined from the resolved distribution of displacements (Fig. S12D), as described in our previous work (4). Specifically,  $r_0$  was determined by determining the intersection between PDF( $r$ ) of the two slower states before inverse transformation (these two slower states correspond to the stationary and mobile states after inverse transformation while the third (fastest) state with apparent diffusion constant of  $4.70 \pm 0.91 \mu\text{m}^2 \text{s}^{-1}$  is an artifact from the cell confinement effect as we showed previously (4, 31):  $r_0 = 137$  nm for  $\Delta P = 0$  kPa;  $r_0 = 99$  nm for  $\Delta P = 4.3 \pm 2.6$  kPa;  $r_0 = 99$  nm for  $\Delta P = 11.6 \pm 1.8$  kPa;  $r_0 = 95$  nm for  $\Delta P = 24.7 \pm 3.7$  kPa.

In the second method (Method 2),  $r_0$  ( $= 127$  nm) was selected as to include 99% of the population of the stationary state ( $D = 0.015 \pm 0.001 \mu\text{m}^2 \text{s}^{-1}$  for  $\Delta P = 0.85$  to 29.3 kPa) (Fig. S12D). Note the displacement distribution here is before applying the inverse transformation method, but the diffusion constant of the stationary state is essentially the same as that after the inverse transformation ( $D_s = 0.03$  to  $0.04 \mu\text{m}^2 \text{s}^{-1}$ ; Fig. 2D), as the cell confinement effect only significantly distorts the displacement distribution of the faster mobile state.

For both methods of determining  $r_0$ , we obtained the thresholded individual residence times (Fig. S12B-C), and their distributions  $f(\tau)$  (e.g., Fig. S12E) were fitted with the following equation (Equation S[24]):

$$f(\tau) = N \exp \left[ - \left( k_{\text{bl}} \frac{T_{\text{int}}}{T_{\text{tl}}} + k_{\text{d}} \right) \tau \right] \quad \text{S[24]}$$

where  $N$  is a scaling parameter,  $k_{\text{bl}}$  is the photobleaching/blinking rate constant of mEos3.2 (independently determined by analyzing the distribution of the mEos3.2 fluorescence on-times in the SMT trajectories, as described in our previous work (2);  $k_{\text{bl}} = 256 \pm 7 \text{ s}^{-1}$ ;  $273 \pm 8 \text{ s}^{-1}$ ;  $268 \pm 6 \text{ s}^{-1}$  for the three  $\Delta P > 0$  groups in Fig. 2F and Fig. S12F;  $k_{\text{bl}} = 327 \pm 6 \text{ s}^{-1}$  for the 0 kPa group),  $T_{\text{int}}$  is the laser integration time (4 ms),  $T_{\text{tl}}$  is the time lapse (60 ms), and  $k_{\text{d}}$  is the effective first-order disassembly rate constant (4).

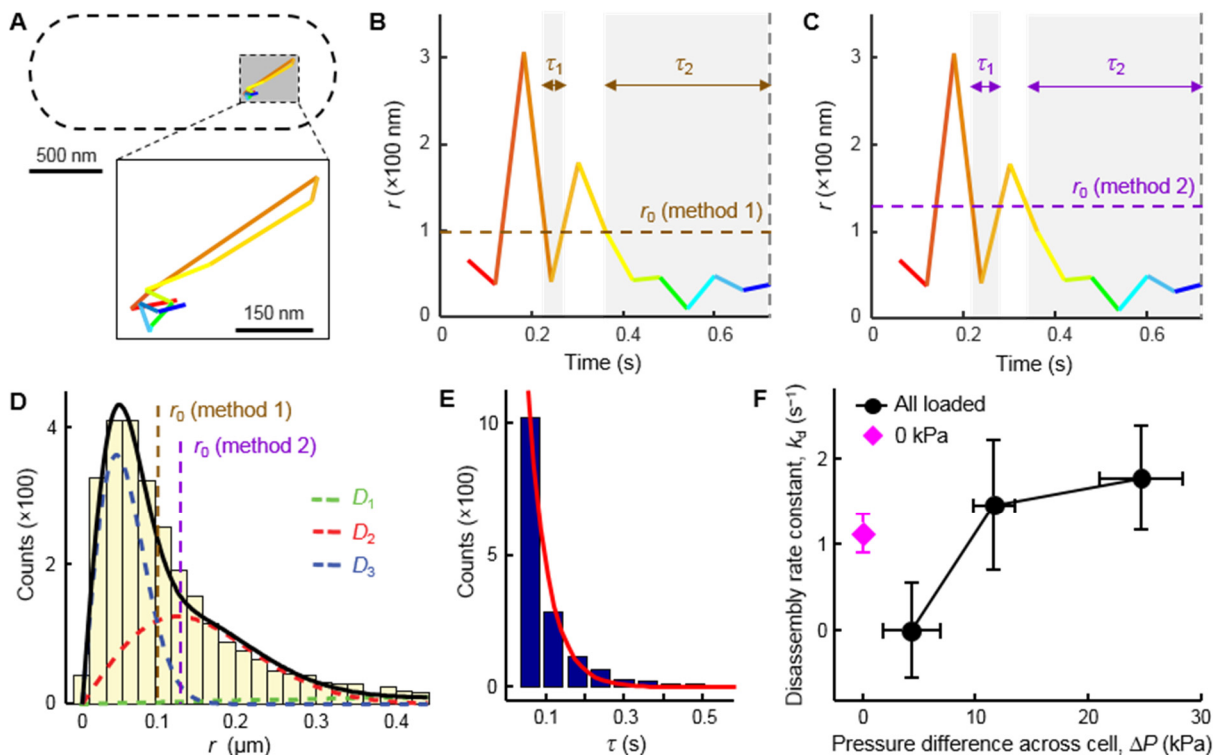

**Fig. S12.** Determination of the effective first-order disassembly rate constant  $k_d$  from SMT trajectories. (*A,B,C*), Position (*A*) and corresponding displacement vs. time trajectories (*B, C*) of a single  $\text{CusA}^{\text{mE}}$  molecule. The horizontal brown dashed line in *B* indicates the threshold  $r_0 \approx 100$  nm (Method 1), while the horizontal purple dashed line in *C* indicates the threshold  $r_0 = 127$  nm (Method 2). Two residence times  $\tau$  are indicated in panels *B* and *C* by the arrows fitting the light gray regions. The vertical gray dashed lines in panels *B* and *C* indicate a photobleaching or photoblinking event. (*D*) For Method 1 of determining  $r_0$ , the experimental PDF( $r$ ) before inverse transformation is fitted with three states, with the fastest artificial state in green ( $D_1$ ) and the two slower states in red ( $D_2$ ) and blue ( $D_3$ ), respectively. The overall fit is delineated in solid black. The vertical brown dashed line indicates the threshold  $r_0 \approx 100$  nm, the intersection between the resolved PDF( $r$ ) of the 2 slower states. The vertical purple dashed line indicates the threshold  $r_0 = 127$  nm for Method 2. (*E*) Distribution of the microscopic residence time  $\tau$  and the fit with Equation S[24]. (*F*)  $k_d$  vs.  $\Delta P$  when using the alternative Method 1, which also shows that  $k_d$  increases with increasing  $\Delta P$ . Error bars are s.d.

#### 1.14. Agarose embedding assay of cell growth

Our experimental procedure for the agarose embedding assay to probe mechanical effects on cell growth was adapted from Auer et al. (13) (Fig. S13A).

$\text{CusA}^{\text{mE}}$  (i.e., CALMF) cells were grown in LB with chloramphenicol (25  $\mu\text{g}/\text{mL}$ , USBiological) for 18 h in 37  $^\circ\text{C}$  with shaking (250 rpm). From this culture, a 1:100 dilution was prepared in LB with chloramphenicol (25  $\mu\text{g}/\text{mL}$ ). This diluted 10 mL culture was incubated at 37  $^\circ\text{C}$  for 4 h (reaching  $\text{OD}_{600} = 0.4$ ) with shaking (250 rpm). The cells were centrifuged (4500 rpm, 4  $^\circ\text{C}$ ) for 10 min. The supernatant was removed, and the resulting cell pellet was re-suspended in 1 mL LB.

UltraPure™ agarose (Invitrogen) was prepared as solutions of 0% (control), 0.25%, and 0.5% w/v in 20 mL LB, corresponding to 0, 2.5, 5 mg/mL, respectively. *Note, it is not possible to prepare agarose gel at concentrations in lower than <0.25%, as in this concentration agarose gel does not solidify.* The agarose solutions were heated in a microwave until the agarose was fully dissolved. The solutions were then transferred to a 50 °C water bath, where they were incubated for at least 20 min to ensure that the temperature of the agarose solution was equilibrated, and to keep the agarose solution in liquid state for the following steps. To prepare each sample for spectrophotometric analysis, 2 mL of this agarose solution was pipetted into a cuvette, and 2 µL of chloramphenicol (from a 25 mg/mL stock, USBiological) was added. The appropriate amount of CuSO<sub>4</sub> (Mallinckrodt) was subsequently added to make final copper concentrations of 0, 0.3, 0.6, and 1 mM. Finally, 67 µL of cells were added to each cuvette. The contents of the cuvette were then gently mixed (resuspended) thoroughly via pipetting; each cuvette was then sealed with Parafilm (Bemis NA), and the cuvettes were allowed to cool to room temperature, where the agarose solution could solidify (typically takes ~45 min).

Once all samples were prepared, the cuvettes were shaken (250 rpm) at room temperature for a period of 5 hr (a time by which all samples had experienced their maximum rate of growth). The absorbance ( $\lambda = 600$  nm) for each sample was measured (Beckman Coulter DU800 UV-Vis spectrophotometer) against its corresponding blank every 30 minutes over this 5 hr duration. The maximum rate of growth was determined for each condition (Fig. S13B), which was used by Auer et al. (13) to report mechanical effects on cell growth rate. The *sensitivity* of cells to copper upon agarose stress was also determined by computing the change in maximum growth rate relative to 0 mM Cu (Fig. S13C-D).

**Possibility of clustering effect on OD measurements.** The absolute absorbance in optical density (OD) measurements can be dependent on the clustering state of the cells in the agarose gel. However, this possible clustering should have minimal effect on our results for the following reasons:

1) We measure OD<sub>600</sub> every 0.5 hour to monitor cell growth in the agarose gel to determine the maximal growth rate over one interval (Fig. S13E, inset, for an exemplary OD<sub>600</sub> vs time trajectory). During such a 0.5 hour interval, the OD<sub>600</sub> only increases by less than ~20%. This OD<sub>600</sub> increase reflects that on average only 20% of the cells divided once, which should not *change* the clustering state of the cells in the agarose. As the growth rate is calculated from the difference in the OD<sub>600</sub> values of two adjacent time points, any clustering effect on each of the two OD<sub>600</sub> values should cancel.

2) We further measured the UV-Vis absorption spectra of cells in agarose gel, rather than a single OD<sub>600</sub> value. The absorption spectra are featureless and show broad absorbance across the visible region, as expected for such bacterial cell samples. More important, the two spectra between which we calculated the maximal growth rate essentially have identical shape (although differ in amplitudes; Fig. S13E), consistent with the idea that the clustering state of the cells did not change much.

3) Auer et al. (13) reported that the measured OD of *E. coli* cells embedded in 1% agarose (higher than our agarose concentration) is linearly correlated with the actual (known) cell density; however, we do note that their measurements did not allow the cells to grow significantly in the gel.



We also attempted to mimic Yan et al. (33), who vortexed cells grown in glass-bead-containing liquid cultures to mechanically disrupt cell clusters. However, vortexing agarose-embedded cells damaged the agarose gel (unsurprisingly) and generated broken gel pieces that scatter light badly and made absorption measurements unreliable.

Furthermore, we attempted to assess the clustering effect: by measuring the OD of agarose-embedded cells and then heat to re-liquify the agarose so that we could resuspend the cells and measure the OD again after solidification. However, these attempts failed, as the melting temperature of this agarose is 88 °C, and it took ~1 hour for the agarose gel to become a liquid. *E. coli* cells are known to lyse and/or decrease in size at  $\geq 55$  °C (34). We searched for low-melting temperature agarose alternatives but found that even these agarose products have a minimal melting point of 65 °C, which would also be thermally lethal to *E. coli*.

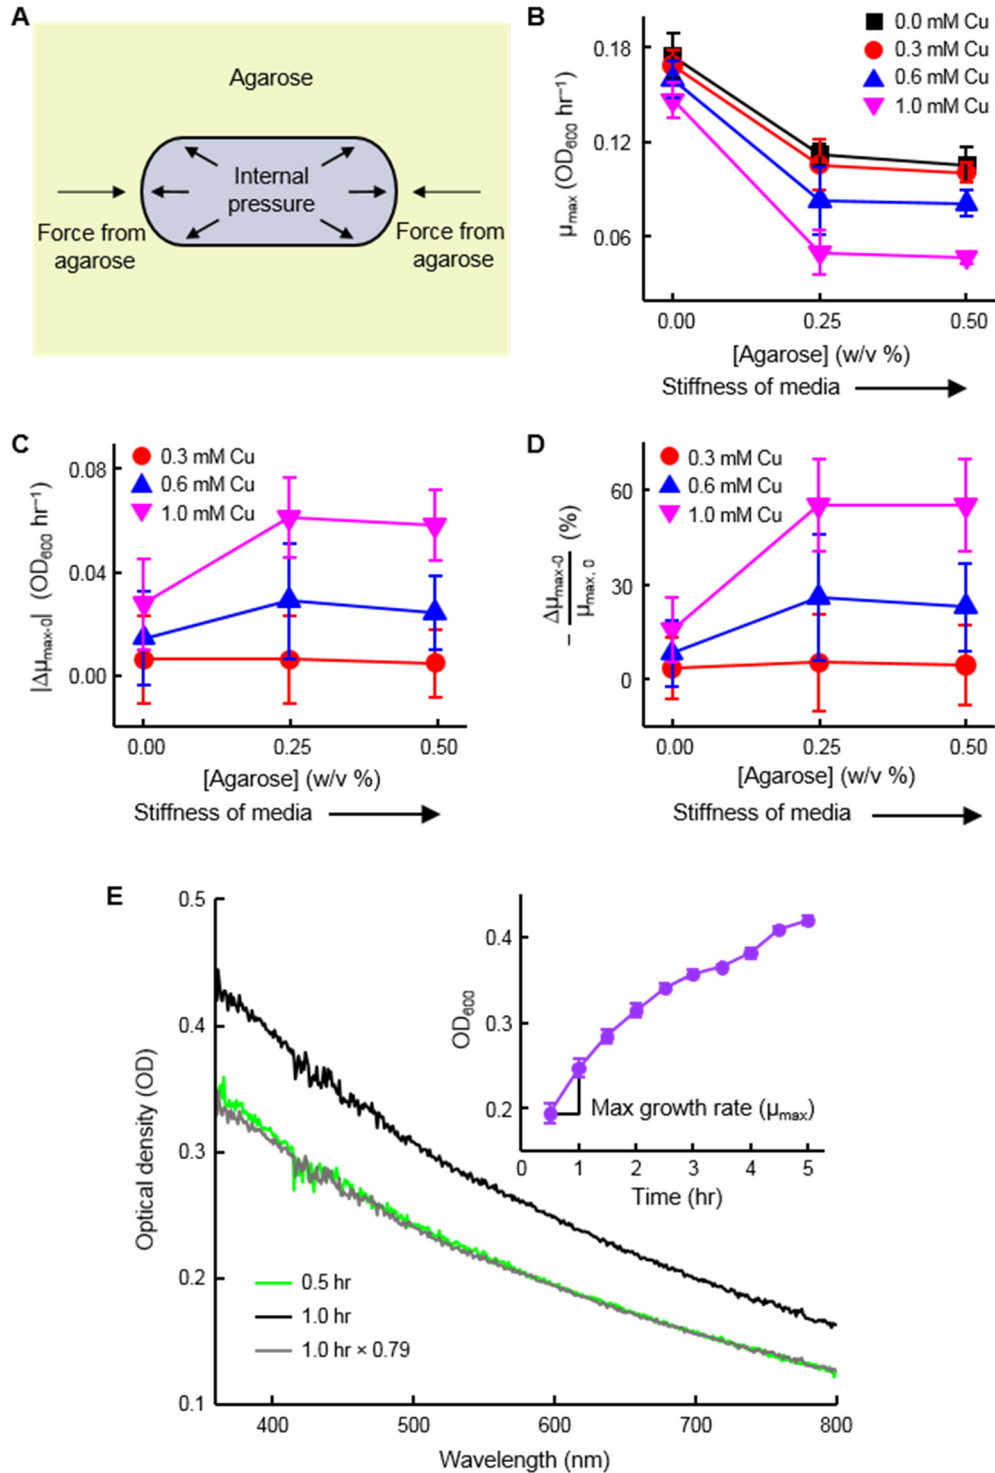

**Fig. S13.** Cells become more sensitive to copper stress at higher agarose concentrations (i.e., more mechanical constraints). (A) A cell encapsulated in agarose gel is depicted. As the cell grows, the agarose gel exerts a compressive pressure ( $P_{cell}$ ) onto the poles of the cell. Internal pressure ( $P_i$ ) within the cell maintains cell shape and prevents buckling. (B) Maximum growth rate ( $\mu_{max}$ ) as a function of percentage of agarose in LB (w/v %). The stiffness of the media increases with increasing agarose concentration. The data in this panel are the same as in Fig. 3B in the main text. Maximum growth rate is influenced by copper concentration ( $p = 2.28 \times 10^{-5}$ ), agarose stiffness (concentration,  $p = 1.10 \times 10^{-10}$ ) as well as copper\*agarose ( $p = 0.046$  between 0% and 0.25% [agarose] datasets),

indicating that mechanical stress enhances the effect to copper. Note from 0.25% to 0.5% agarose, the reduction of growth rate by mechanical stress has reached saturation (i.e., plateaued). (C) Sensitivity of cells to copper stress was determined as the absolute value of change in  $\mu_{\max}$  relative to 0 mM Cu (denoted as  $\mu_{\max-0}$ ). (D) Sensitivity of cells to copper stress was determined as the percent decrease in maximum growth rate ( $\mu_{\max}$ ) relative to 0 mM Cu. Data were recorded in triplicate. Error bars in B-D are s.d. (E) Absorption spectra of 0.25% agarose-embedded *E. coli* cells at 0.5 hr and 1.0 hr time points of cell growth with 0 mM Cu (i.e., our fastest growth condition among all agarose-embedded samples). These two time points correspond to the period of maximal cell growth (see inset on OD<sub>600</sub> vs time). The gray spectrum depicts the 1-hr (black) curve multiplied by a scaling factor (0.79) to be overlaid on the green spectrum. Inset: OD<sub>600</sub> vs time of 0.25% agarose-embedded *E. coli* cells with 0 mM Cu. The maximum growth rate was determined as the largest change in OD<sub>600</sub> between two consecutive timepoints (i.e., between the 0.5 and 1 hr timepoints here). Error bars in E are s.d. of 5 replicates.

## 2. Pairwise distance distribution analysis supports that clustering or declustering is not responsible for the observed population shifts in CusA disassembly

In our previous work, we discovered CusA<sup>mE</sup> trimers tend to cluster together under certain conditions (e.g., when examined in a  $\Delta cusCB$  double-deletion strain) (4). To determine whether CusA clustering played a role in the increased disassembly observed when cells are exposed to increased levels of mechanical stress (i.e.,  $\Delta P$ ), we examine the pairwise distance distributions of individual CusA<sup>mE</sup> proteins that were tracked at different pressure conditions. Pairwise distance distribution (PWD) is defined here as the range of Euclidean distances between pairs of first localizations of individual CusA<sup>mE</sup> proteins. The more prominent the clustering, the shorter the pairwise distances are expected.

Fig. S14A-B show the normalized pairwise distance distributions for the three  $\Delta P$  groups of individual cells (>400 cells per pressure condition/group), and their differences, respectively. Within experimental uncertainty, the distributions are indistinguishable from one another, and no significant shortening in the pairwise distances was observed with increasing  $\Delta P$ , indicating that clustering of CusA trimers does not play a significant role in the observed increase in the CusA disassembly upon greater mechanical stress. Note in Fig. S14B, we consider the small peak at ~70 nm in the pink curve to be insignificant, as it is close to the uncertainty (i.e., standard deviation ~57 nm) of the pairwise distances.

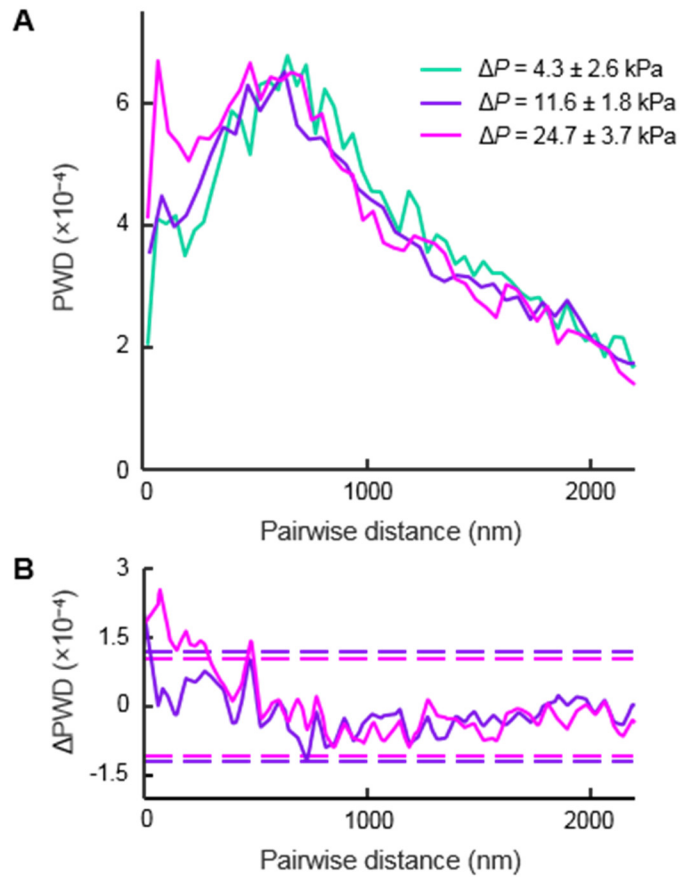

**Fig. S14.** Pairwise distance distribution analysis of CusA<sup>mE</sup> shows no significant changes under different levels of mechanical stress (i.e.,  $\Delta P$ ). (A) Normalized pairwise distance distribution (PWD) obtained from CusA<sup>mE</sup> SMT results. Green: cells with  $\Delta P = 4.3 \pm 2.6$  kPa; purple:  $\Delta P = 11.6 \pm 1.8$  kPa; pink:  $\Delta P = 24.7 \pm 3.7$  kPa. (B) Difference of normalized PWDs in A, relative to that of the green curve. The dashed lines are the 99.7% confidence bounds, which represent  $3\times$  the standard deviation of the respective  $\Delta$ PWDs between 2 simulations of randomly-distributed proteins on the cell membrane displaying no clustering: one simulation with 5,000 cells and a total of  $\sim 40,000$  to  $\sim 50,000$  locations (which give statistically saturated results), and the other with the same number of cells as obtained under experimental conditions (e.g.,  $\sim 350$  cells in each group with a total of  $\sim 3,000$  to  $\sim 3,500$  locations), as we previously described (4). The cell geometry of each simulation matched that of the average cell geometry of the corresponding experimental dataset.

### 3. Estimation of energy needed to disrupt the CusCBA complex

While the crystal structure of the complete CusCBA complex is not yet known, the CusB<sub>6</sub>A<sub>3</sub> complex crystal structure has been elucidated (35). Based on the reported CusB-CusA interaction affinity of  $5.1 \pm 0.3 \mu\text{M}$  (35), as well as Equation S[25],

$$\Delta G = RT \ln \left( \frac{K_D}{c} \right) \quad \text{S[25]}$$

where  $c$  is the standard reference concentration of 1M, it follows that the  $\Delta G$  needed to form a complex of CusCBA is estimated to be about  $-7$  kcal/mol.

Moreover,  $K_D$  (and thus  $\Delta G$ ) can be estimated from the ratio of disassembled vs. assembled fractional populations, which are directly obtainable from our single-molecule tracking measurements. Across the three  $\Delta P > 0$  conditions (reported as the three “all” groups) in this study,  $\Delta G$  varies from  $-0.6$  to  $-0.1$  kcal/mol, from low to high  $\Delta P$ . Considering the average copy number of CusA<sub>3</sub> trimers in a cell is  $\sim 30$ , these  $\Delta G$  values translate to about  $\sim 10^{-24}$  to  $10^{-23}$  kcal for the formation of all CusCBA complexes in one cell, which would be the energy required to disrupt *all* CusCBA complexes *entirely* in one cell.

We additionally determined the strain energy involved in deforming the cell envelope during extrusion loading (Fig. S15A) and gel encapsulation (Fig. S15B) using finite element models. The total strain energy in the entire cell envelope during extrusion loading was on the order of  $10^{-17}$  kcal while the strain energy in gel encapsulation was on the order of  $10^{-18}$  to  $10^{-13}$  kcal. The strain energy calculated in this manner is distributed through multiple components of the cell envelope as well as CusCBA, and far exceeds what is required to disrupt all of the CusCBA complexes in an entire cell. Furthermore, in both cases the strain energy was dominated by distortional strains (the contribution from octahedral shear stress), further supporting our association between octahedral shear stress and disassembly of CusCBA. As an important note, it is not necessary for mechanical stresses to disrupt CusCBA – there only needs to be sufficient energy to shift the assembly-disassembly kinetics rate to cause the observed increase in disassembly.

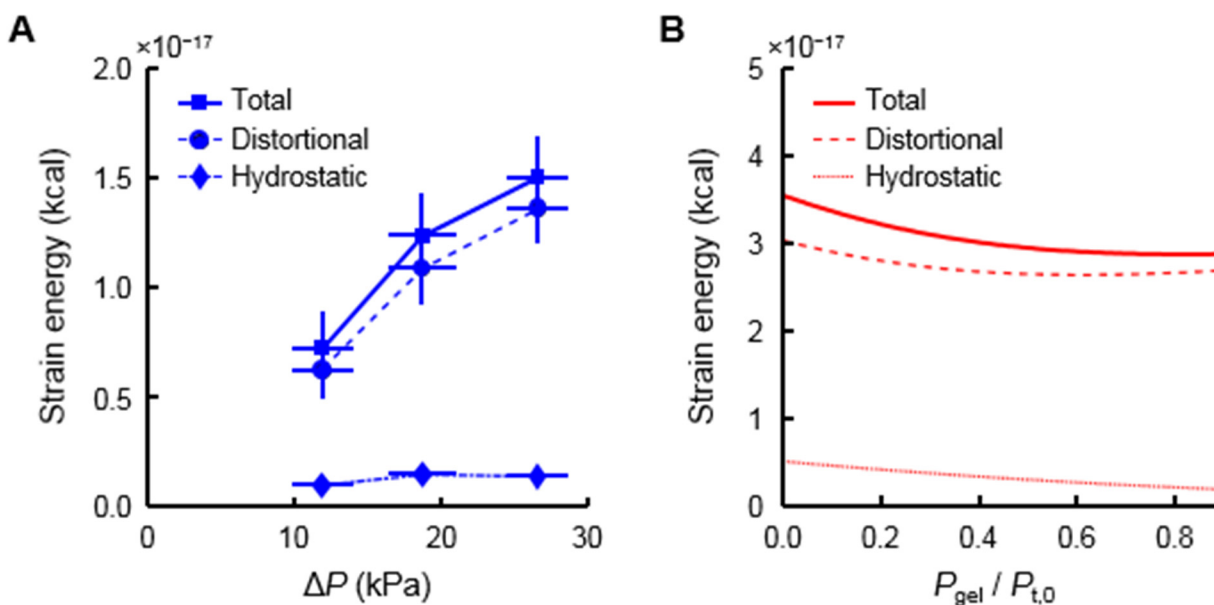

**Fig. S15.** Strain energy in the cell envelope associated with (A) extrusion loading and (B) gel encapsulation are shown. The total strain energy is dominated by the distortional component (octahedral shear stress).

#### 4. Additional results on cell growth rate within tapered channels

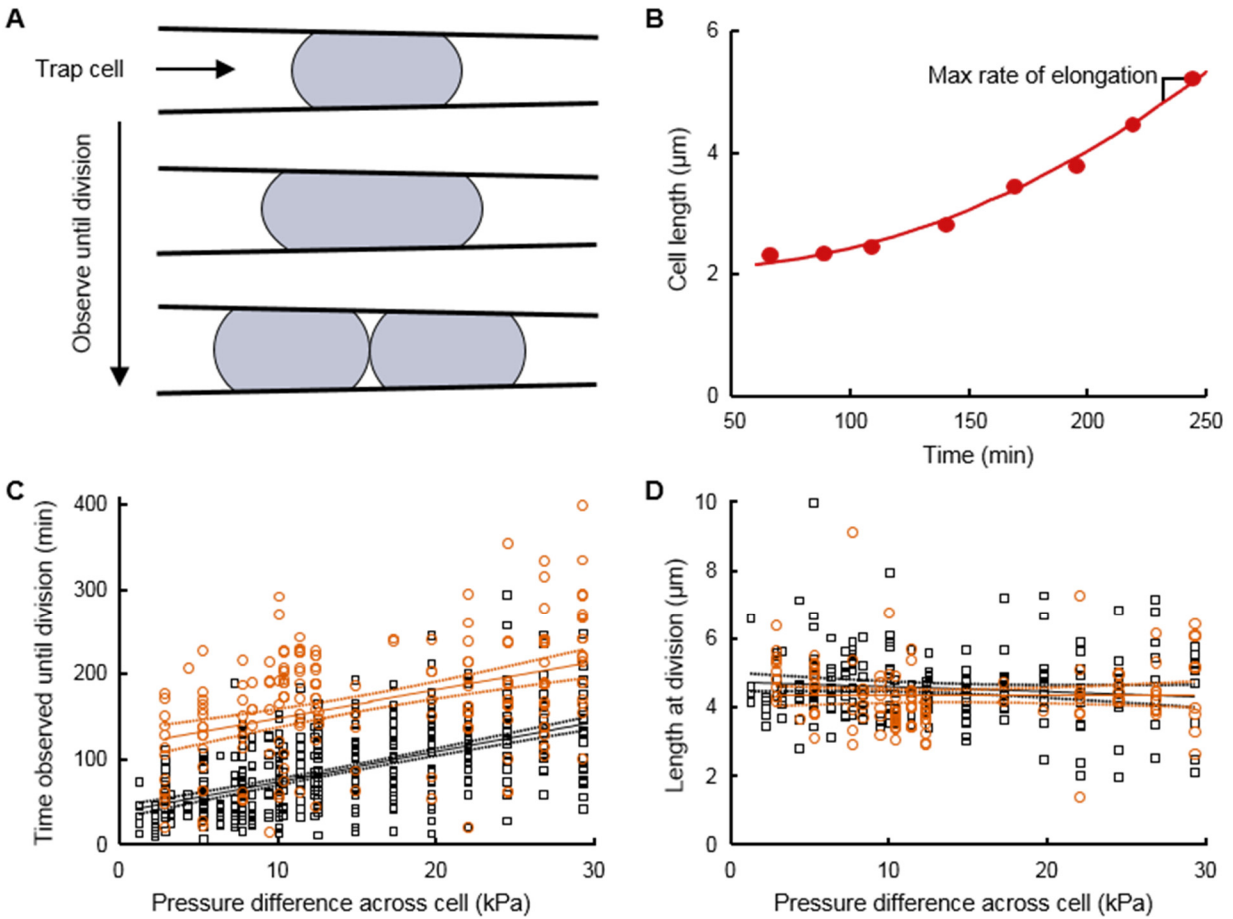

**Fig. S16.** Trapped cells were observed until division, and cellular reproduction was slowed by extrusion loading. (A) A single cell is trapped at an unknown point during the cell cycle. Sequential images were then taken until the cell was observed to divide. (B) The cell length was measured using line profiling (see Fig. S9) of bright-field images. A quadratic fitting was applied, and the maximum rate or elongation extracted from the fitted line in the time frame was observed. Data from a typical cell is shown. (C) Time observed until division was plotted for cells not treated with copper (black squares,  $n = 468$ ) and for cells treated with 2.5 mM Cu (orange circles,  $n = 209$ ). An increase in time observed until division was seen for both copper treatment and no treatment cells. All tested pressure difference levels for applied average pressures of 12.5 and 30.0 kPa saw cell viability. (D) The length measured at cell division was not noted to change with pressure difference.

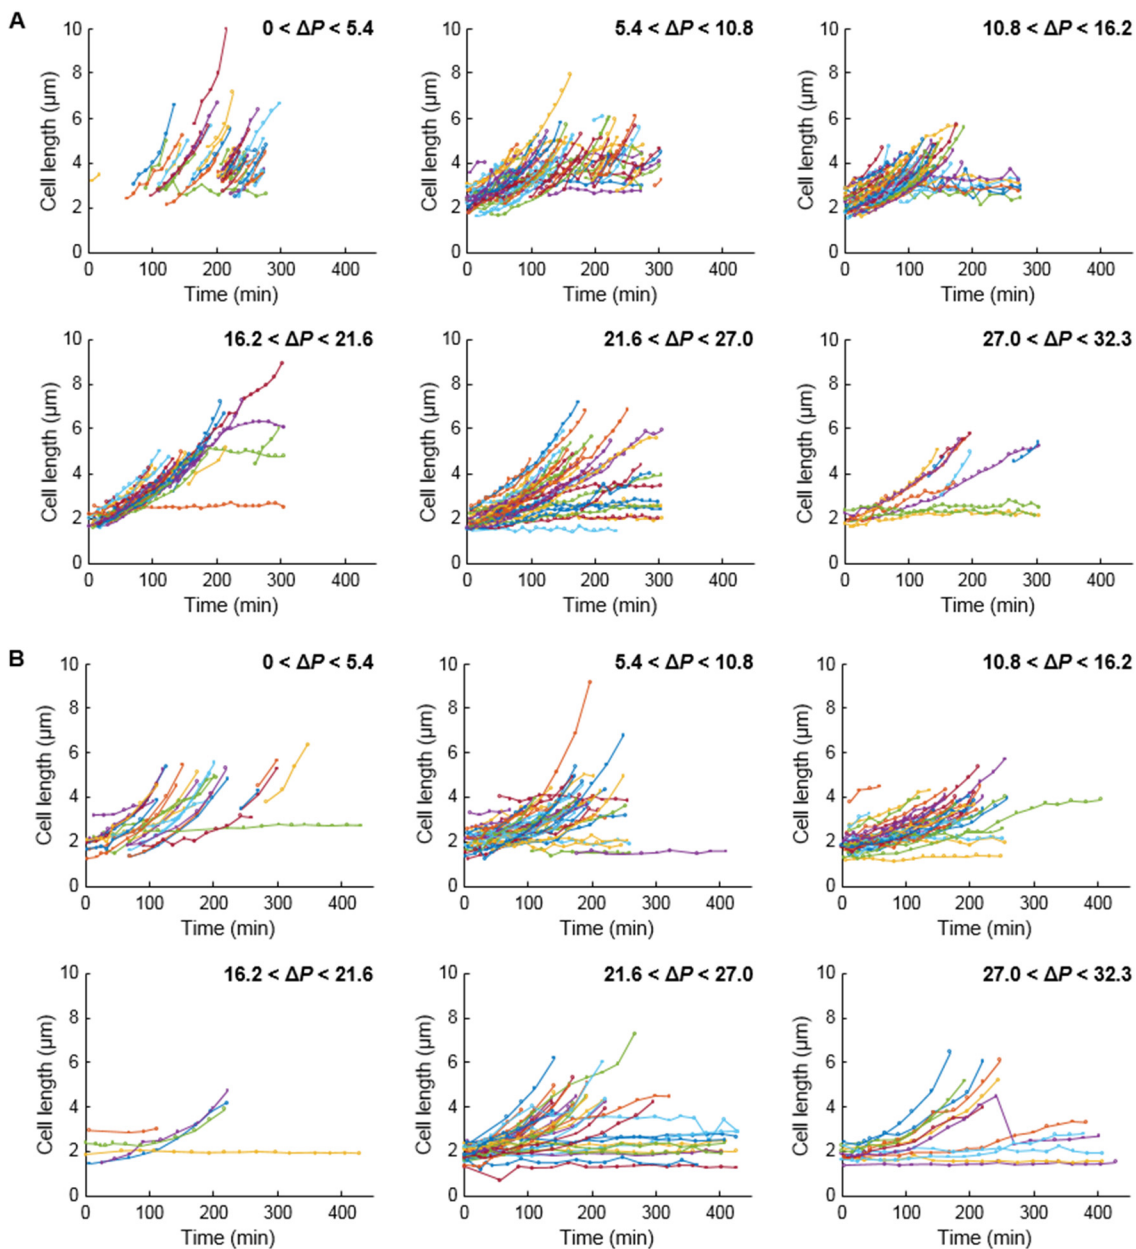

**Fig. S17.** Measured cell length over time for cells that were observed until division. Cells were divided into six pressure difference ( $\Delta P$ ) groupings for (A), no copper treatment ( $n = 260$ ) and (B), 2.5 mM copper treatment ( $n = 155$ ). Measurements were made as described in Fig. S16. Cells where division was not observed are included.

### 5. Stiffness–sorted analysis suggests softer cells are more responsive to pressure–induced deformation)

To evaluate whether cell stiffness is related to mechanically inducible CusCBA disassembly, we used the distance traveled by the cell in the tapers as an approximate metric for cell stiffness (1) — the less stiff the cell, the farther the cell can travel into the taper. Upon

plotting each cell's distance traveled against its corresponding pressure difference  $\Delta P$ , we fitted the data with a saturation curve (Fig. S18A).

We then computed each cell's residual by taking the difference between the cell's actual distance traveled and its predicted value from the saturation curve equation (Fig. S18B). To account for uncertainty, we removed cells with residuals between  $-3$  and  $+3 \mu\text{m}$ ; the range was chosen to be significantly larger than the average length of the cells studied. The resulting ( $n = 1011$ ) cells were sorted into two categories: one category of cells with positive residuals and presumably "less stiff," and the other with negative residuals and "more stiff."

For each category, we further sorted the cells into three groups of similar  $\Delta P$  values, and analyzed the CusA<sup>mE</sup> diffusive behaviors in each group. The resulting fractional population of the disassembled state suggests that less stiff cells show perhaps more response to pressure-induced CusCBA disassembly (Fig. S18C).

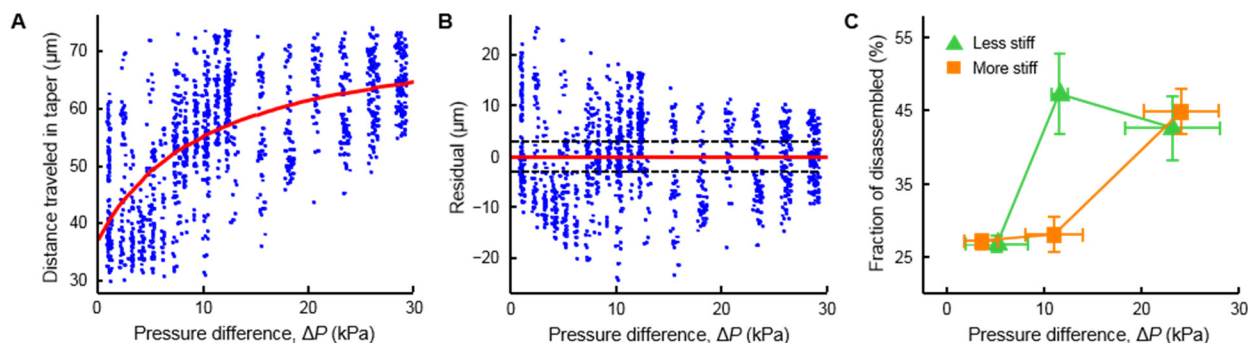

**Fig. S18.** Stiffness-sorted analysis suggests less stiff cells are more responsive to pressure-induced CusCBA disassembly. (A) Scatter plot of distance traveled in the tapered channels as a function of pressure difference ( $\Delta P$ ). Each blue dot represents one cell. Red line denotes saturation curve fitting: Distance traveled =  $[74.29(\Delta P) + 389.7]/(10.49 + \Delta P)$ . (B) Scatter plot of each cell's residual vs. pressure difference. Red line represents the saturation curve; the black dashed lines are at residuals of  $+3$  and  $-3 \mu\text{m}$ . All cells within these two bounds were eliminated from the analysis presented in panel C. (C) Fractional population of the disassembled state of CusA with increasing  $\Delta P$  for cells of differing stiffness. Green triangles denote cells with positive residuals (less stiff cells); orange squares denote cells with negative residuals (more stiff cells).

## 6. Additional references

1. Sun X, Weinlandt WD, Patel H, Wu M, & Hernandez CJ (2014) A microfluidic platform for profiling biomechanical properties of bacteria. *Lab Chip* 14:2491-2498.
2. Chen TY, *et al.* (2015) Concentration- and chromosome-organization-dependent regulator unbinding from DNA for transcription regulation in living cells. *Nat Commun* 6:7445.
3. Kirby BJ (2010) *Micro- and nanoscale fluid mechanics : transport in microfluidic devices* (Cambridge University Press, New York).
4. Santiago AG, *et al.* (2017) Adaptor protein mediates dynamic pump assembly for bacterial metal efflux. *Proc Natl Acad Sci USA* 114:6694-6699.
5. Timoshenko S & Woinowsky-Krieger S (1959) *Theory of plates and shells* (McGraw-Hill, New York,) 2d Ed p 580 p.



6. Yao X, Jericho M, Pink D, & Beveridge T (1999) Thickness and elasticity of gram-negative murein sacculi measured by atomic force microscopy. *J Bacteriol* 181:6865-6875.
7. Deng Y, Sun M, & Shaevitz JW (2011) Direct measurement of cell wall stress stiffening and turgor pressure in live bacterial cells. *Phys Rev Lett* 107:158101.
8. Gumbart JC, Beeby M, Jensen GJ, & Roux B (2014) Escherichia coli peptidoglycan structure and mechanics as predicted by atomic-scale simulations. *PLoS Comput Biol* 10:e1003475.
9. Gan L, Chen S, & Jensen GJ (2008) Molecular organization of Gram-negative peptidoglycan. *Proc Natl Acad Sci USA* 105:18953-18957.
10. Furchtgott L, Wingreen NS, & Huang KC (2011) Mechanisms for maintaining cell shape in rod-shaped Gram-negative bacteria. *Mol Microbiol* 81:340-353.
11. Cox CD, Bavi N, & Martinac B (2018) Bacterial mechanosensors. *Annu Rev Physiol* 80:71-93.
12. Amir A, Babaeipour F, McIntosh DB, Nelson DR, & Jun S (2014) Bending forces plastically deform growing bacterial cell walls. *Proc Natl Acad Sci USA* 111:5778-5783.
13. Auer GK, *et al.* (2016) Mechanical genomics identifies diverse modulators of bacterial cell stiffness. *Cell Syst* 2:402-411.
14. Tuson HH, *et al.* (2012) Measuring the stiffness of bacterial cells from growth rates in hydrogels of tunable elasticity. *Mol Microbiol* 84:874-891.
15. Wang S, Arellano-Santoyo H, Combs PA, & Shaevitz JW (2010) Actin-like cytoskeleton filaments contribute to cell mechanics in bacteria. *Proc Natl Acad Sci USA* 107:9182-9185.
16. Caspi Y (2014) Deformation of filamentous Escherichia coli cells in a microfluidic device: a new technique to study cell mechanics. *PloS One* 9:e83775.
17. Cayley DS, Guttman HJ, & Record MT, Jr. (2000) Biophysical characterization of changes in amounts and activity of Escherichia coli cell and compartment water and turgor pressure in response to osmotic stress. *Biophys J* 78:1748-1764.
18. Koch AL (1990) The surface stress theory for the case of Escherichia coli: the paradoxes of gram-negative growth. *Res Microbiol* 141:119-130.
19. Zhang M, *et al.* (2012) Rational design of true monomeric and bright photoactivatable fluorescent proteins. *Nat Methods* 9:727-729.
20. McKinney SA, Murphy CS, Hazelwood KL, Davidson MW, & Looger LL (2009) A bright and photostable photoconvertible fluorescent protein. *Nat Methods* 6:131-133.
21. Elf J, Li GW, & Xie XS (2007) Probing transcription factor dynamics at the single-molecule level in a living cell. *Science* 316:1191-1194.
22. English BP, *et al.* (2011) Single-molecule investigations of the stringent response machinery in living bacterial cells. *Proc Natl Acad Sci USA* 108:E365-373.
23. Mehta P, *et al.* (2013) Dynamics and stoichiometry of a regulated enhancer-binding protein in live Escherichia coli cells. *Nat Commun* 4:1997.
24. Bakshi S, Bratton BP, & Weisshaar JC (2011) Subdiffraction-limit study of Kaede diffusion and spatial distribution in live Escherichia coli. *Biophys J* 101:2535-2544.
25. Mazza D, Abernathy A, Golob N, Morisaki T, & McNally JG (2012) A benchmark for chromatin binding measurements in live cells. *Nucleic Acids Res* 40:e119.
26. Javer A, *et al.* (2013) Short-time movement of E. coli chromosomal loci depends on coordinate and subcellular localization. *Nat Commun* 4:3003.

27. Gahlmann A & Moerner WE (2014) Exploring bacterial cell biology with single-molecule tracking and super-resolution imaging. *Nat Rev Microbiol* 12:9-22.
28. Durisic N, Laparra-Cuervo L, Sandoval-Álvarez Á, Borbely JS, & Lakadamyali M (2014) Single-molecule evaluation of fluorescent protein photoactivation efficiency using an in vivo nanotemplate. *Nat Methods* 11:156.
29. Annibale P, Scarselli M, Greco M, & Radenovic A (2012) Identification of the factors affecting co-localization precision for quantitative multicolor localization microscopy. *Opt Nano* 1:9.
30. Itan E, Carmon G, Rabinovitch A, Fishov I, & Feingold M (2008) Shape of nonseptated *Escherichia coli* is asymmetric. *Phys Rev E Stat Nonlin Soft Matter Phys* 77:061902.
31. Chen TY, *et al.* (2015) Quantifying multistate cytoplasmic molecular diffusion in bacterial cells via inverse transform of confined displacement distribution. *J Phys Chem B* 119:14451-14459.
32. Oswald F, E LMB, Bollen YJ, & Peterman EJ (2014) Imaging and quantification of trans-membrane protein diffusion in living bacteria. *Phys Chem Chem Phys* 16:12625-12634.
33. Yan J, Sharo AG, Stone HA, Wingreen NS, & Bassler BL (2016) *Vibrio cholerae* biofilm growth program and architecture revealed by single-cell live imaging. *Proc Natl Acad Sci USA* 113:E5337-E5343.
34. Membrillo-Hernández J, La Mora AN-D, Del Rio-Albrechtsen T, Camacho-Carranza R, & Gomez-Eichelmann MC (1995) Thermally-induced cell lysis in *Escherichia coli* K12. *J Basic Microbiol* 35:41-46.
35. Su CC, *et al.* (2011) Crystal structure of the CusBA heavy-metal efflux complex of *Escherichia coli*. *Nature* 470:558-562.
